# Supplementary material for: Highly efficient C–C cross-coupling for installing thiophene rings into π-conjugated systems
Source: Royal Society of Chemistry journal article supplement (doi:10.1039/c4qo00167b), 2014-01-01

## Electronic Supplementary Information

### Highly Efficient C-C Cross Coupling for Installing Thiophene Rings into $\pi$ -Conjugated Systems

*Juan Song<sup>\*,†</sup>, Fuliang Wei<sup>†</sup>, Wei Sun<sup>†</sup>, Xiao Cao<sup>†</sup>, Chao Liu<sup>\*,‡</sup>, Linghai Xie<sup>\*,†</sup>, Wei Huang<sup>†</sup>*

<sup>†</sup> Key Laboratory for Organic Electronics and Information Displays, Institute of Advanced Materials,

Nanjing University of Posts and Telecommunications, Nanjing 210023, P. R. China.

<sup>‡</sup> College of Chemistry and Molecular Sciences, Wuhan University, Wuhan 430072, P. R. China.

*iamjsong@njupt.edu.cn; chao.liu@whu.edu.cn; iamlhxie@njupt.edu.cn.*

## Contents

|                                                                        |     |
|------------------------------------------------------------------------|-----|
| I. General Information .....                                           | S2  |
| II. Experimental Details and Characterization Data .....               | S3  |
| III. References .....                                                  | S11 |
| IV. Copies of Product <sup>1</sup> H NMR and <sup>13</sup> C NMR ..... | S12 |

## General Information

All reactions were carried out using pre-dried glassware. DMF was purified by distillation under reduced pressure with Calcium hydride. All reactions were carried out under a nitrogen atmosphere unless otherwise noted. The progress of all reactions was monitored by thin-layer chromatography to ensure the reactions had reached completion. Gas chromatographic analyses were performed on Varian GC 2000 gas chromatography instrument with a FID detector and naphthalene was added as internal standard. High Resolution mass spectrometry (HRMS) data report were performed on Waters Micromass GCT Premier, ionization mode: EI<sup>+</sup> and IonSpec 4.7 Tesla FTMS. <sup>1</sup>H and <sup>13</sup>C NMR data were recorded with Varian Mercury (400 MHz) spectrometers with tetramethylsilane as an internal standard. All chemical shifts ( $\delta$ ) are reported in ppm and coupling constants ( $J$ ) in Hz. All chemical shifts are reported relative to tetramethylsilane and *d*-solvent peaks (77.00 ppm, chloroform), respectively. All solvents were dried and distilled before use according to the standard methods. Unless otherwise noted, materials were obtained from commercial suppliers and used without further purification.

## Experimental Details

### The preparation of Pd(OAc)<sub>2</sub> solution.

To an oven-dried 25 mL round bottom flask, 5.6 mg Pd(OAc)<sub>2</sub> was added under nitrogen atmosphere followed by 5 mL DMF. The solution was dissolved in an ultrasonic cleaner and 1.12 mg/mL of Pd(OAc)<sub>2</sub> solution was obtained.

### Typical procedure for the preparation of 2-phenylthiophene.

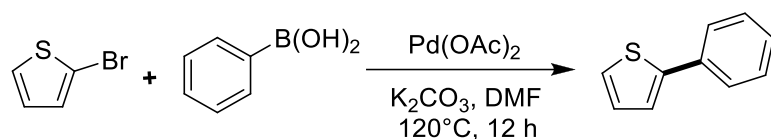

Phenylboronic acid (73.2 mg, 0.6 mmol) and K<sub>2</sub>CO<sub>3</sub> (138 mg, 1.0 mmol) were placed in a Shlenck tube, which was filled with nitrogen by using standard Schlenk techniques. 2-Bromothiophene (81.5 mg, 0.5 mmol), Pd(OAc)<sub>2</sub> solution in DMF (0.024 mg, 0.00010 mmol) and DMF (1.0 mL), were consequently added to the reaction tube. The reaction mixture was stirred at 120 °C for 12 h. The resulting mixture was quenched with water. Then the suspension solution was extracted by ethyl acetate (3\*5 mL), the organic layers were combined, dried over sodium sulfate and concentrated under reduced pressure. The pure product was obtained by flash column chromatography on silica gel (petroleum : ethyl acetate = 200:1)

### Typical procedure for the preparation of 2,5-bis(4-tert-butylphenyl)thiophene.

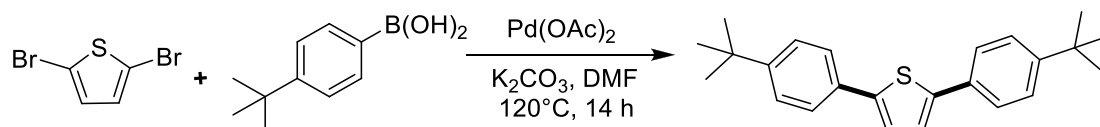

4-tert-butylphenylboronic acid (106.8 mg, 0.6 mmol) and K<sub>2</sub>CO<sub>3</sub> (138 mg, 1.0 mmol) were placed in a Shlenck tube, which was filled with nitrogen by using standard

Schlenk techniques. 2,5-dibromothiophene (60.5 mg, 0.25 mmol), Pd(OAc)<sub>2</sub> solution in DMF (0.0224 mg, 0.00010 mmol) and DMF (1.0 mL), were consequently added to the reaction tube. The reaction mixture was stirred at 120 °C for 14 h. The resulting mixture was quenched with water. Then the suspension solution was extracted by ethyl acetate (3\*5 mL), the organic layers were combined, dried over sodium sulfate and concentrated under reduced pressure. The pure product was obtained by flash column chromatography on silica gel (petroleum : ethyl acetate = 100:1).

**Typical procedure for the preparation of 5,5'-diphenyl-2,2'-bithiophene.**

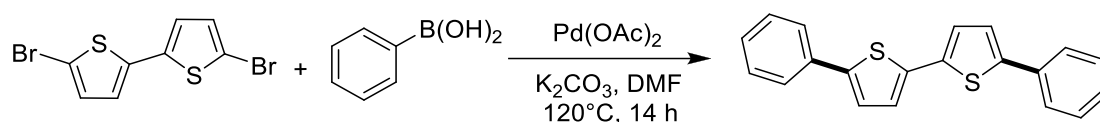

Phenylboronic acid (73.2 mg, 0.6 mmol) and K<sub>2</sub>CO<sub>3</sub> (138 mg, 1.0 mmol) were placed in a Schlenk tube, which was filled with nitrogen by using standard Schlenk techniques. 2,5-dibromothiophene (81 mg, 0.25 mmol), Pd(OAc)<sub>2</sub> solution in DMF (0.0224 mg, 0.00010 mmol) and DMF (1.0 mL), were consequently added to the reaction tube. The reaction mixture was stirred at 120 °C for 14 h. The resulting mixture was quenched with water. Then the suspension solution was extracted by ethyl acetate (3\*5 mL), the organic layers were combined, dried over sodium sulfate and concentrated under reduced pressure. The pure product was obtained by flash column chromatography on silica gel (petroleum: dichloromethane = 20:1).

## Characterization Data

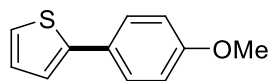

**2-(4-methoxyphenyl)thiophene (3a)**<sup>1</sup>: <sup>1</sup>H NMR (400 MHz, CDCl<sub>3</sub>) δ 7.54 (d, *J* = 8.8 Hz, 2H), 7.24 – 7.16 (m, 2H), 7.10 – 7.00 (m, 1H), 6.91 (d, *J* = 8.8 Hz, 2H), 3.83 (s, 3H). <sup>13</sup>C NMR (101 MHz, CDCl<sub>3</sub>) δ 159.0, 127.7, 127.0, 123.6, 121.9, 114.1, 55.2.

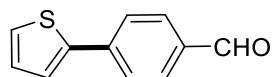

**4-(thiophen-2-yl)benzaldehyde (3b)**<sup>2</sup>: <sup>1</sup>H NMR (400 MHz, CDCl<sub>3</sub>) δ 9.98 (s, 1H), 7.93 – 7.79 (m, 2H), 7.74 (d, *J* = 8.3 Hz, 2H), 7.45 (dd, *J* = 3.7, 1.0 Hz, 1H), 7.38 (dd, *J* = 5.1, 1.0 Hz, 1H), 7.12 (dd, *J* = 5.0, 3.7 Hz, 1H). <sup>13</sup>C NMR (101 MHz, CDCl<sub>3</sub>) δ 191.4, 142.6, 140.0, 134.9, 130.4, 128.4, 126.9, 125.9, 125.0.

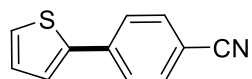

**4-(thiophen-2-yl)benzonitrile (3c)**<sup>3</sup>: <sup>1</sup>H NMR (400 MHz, CDCl<sub>3</sub>) δ 7.68 (q, *J* = 8.3 Hz, 4H), 7.42 (dd, *J* = 8.9, 4.4 Hz, 2H), 7.16 – 7.11 (m, 1H). <sup>13</sup>C NMR (101 MHz, CDCl<sub>3</sub>) δ 141.9, 138.5, 132.6, 128.4, 126.9, 125.9, 125.0, 118.7, 110.4.

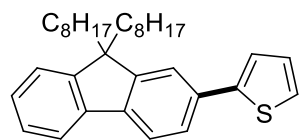

**2-(9,9-dioctyl-9H-fluoren-2-yl)thiophene (3d)**<sup>4</sup>: <sup>1</sup>H NMR (400 MHz, CDCl<sub>3</sub>) δ 7.69 (dd, *J* = 7.3, 3.3 Hz, 2H), 7.59 (dd, *J* = 13.7, 5.8 Hz, 2H), 7.44 – 7.26 (m, 5H), 7.11 (dd, *J* = 5.0, 3.6 Hz, 1H), 2.14 – 1.84 (m, 4H), 1.22 – 0.95 (m, 20H), 0.80 (t, *J* = 7.0 Hz, 6H), 0.64 (d, *J* = 7.3 Hz, 4H). <sup>13</sup>C NMR (101 MHz, CDCl<sub>3</sub>) δ 151.5, 150.9, 145.3, 140.7, 133.2, 128.1, 127.1, 126.8, 124.9, 124.5, 122.9, 120.1, 119.7, 55.2, 40.4, 31.8, 30.1, 29.3, 23.8, 22.6, 14.1.

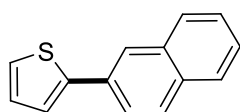

**2-(naphthalen-2-yl)thiophene (3e)**<sup>5</sup>: <sup>1</sup>H NMR (400 MHz, CDCl<sub>3</sub>) δ 8.05 (d, *J* = 1.2 Hz, 1H), 7.89 – 7.79 (m, 3H), 7.75 (dd, *J* = 8.5, 1.8 Hz, 1H), 7.53 –

7.39 (m, 3H), 7.32 (dd,  $J = 5.1, 1.1$  Hz, 1H), 7.13 (dd,  $J = 5.1, 3.6$  Hz, 1H).  $^{13}\text{C}$  NMR (101 MHz,  $\text{CDCl}_3$ )  $\delta$  132.6, 131.7, 128.5, 128.0, 127.6, 126.5, 125.9, 125.0, 124.4, 124.1, 123.4.

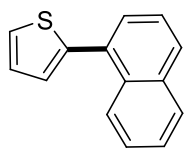

**2-(naphthalen-1-yl)thiophene (3f)**<sup>6</sup>:  $^1\text{H}$  NMR (400 MHz,  $\text{CDCl}_3$ )  $\delta$  8.26 – 8.17 (m, 1H), 7.89 – 7.80 (m, 2H), 7.55 (d,  $J = 7.1$  Hz, 1H), 7.46 (dt,  $J = 9.1, 4.3$  Hz,

3H), 7.39 (dd,  $J = 5.1, 1.2$  Hz, 1H), 7.23 (d,  $J = 3.5$  Hz, 1H), 7.16 (dd,  $J = 5.1, 3.5$  Hz, 1H).  $^{13}\text{C}$  NMR (101 MHz,  $\text{CDCl}_3$ )  $\delta$  141.6, 133.7, 132.3, 131.7, 128.4 – 128.0, 127.2, 126.3, 125.9, 125.6, 125.1.

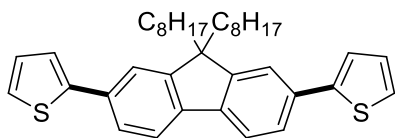

**2,2'-(9,9-dioctyl-9H-fluorene-2,7-diyl)dithiophene (3g)**<sup>7</sup>:  $^1\text{H}$  NMR (400 MHz,  $\text{CDCl}_3$ )  $\delta$  7.67 (d,  $J = 7.9$  Hz, 2H), 7.63 –

7.58 (m, 2H), 7.56 (d,  $J = 1.2$  Hz, 2H), 7.38 (dd,  $J = 3.6, 1.1$  Hz, 2H), 7.33 – 7.24 (m, 2H), 7.14 – 7.06 (m, 2H), 2.16 – 1.88 (m, 4H), 1.21 – 0.97 (m, 20H), 0.81 (dt,  $J = 14.1, 5.5$  Hz, 6H), 0.73 – 0.59 (m, 4H).  $^{13}\text{C}$  NMR (101 MHz,  $\text{CDCl}_3$ )  $\delta$  151.7, 145.2, 140.3, 133.3, 128.1, 125.0, 124.6, 122.9, 120.2, 55.3, 40.5, 31.9, 30.0, 29.8, 29.3, 23.8, 22.7, 14.2.

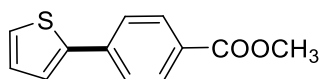

**methyl 4-(thiophen-2-yl)benzoate (3h)**<sup>8</sup>:  $^1\text{H}$  NMR (400 MHz,  $\text{CDCl}_3$ )

$\delta$  8.10 – 7.98 (m, 2H), 7.72 – 7.63 (m, 2H), 7.42 (dd,  $J = 3.6, 1.1$  Hz, 1H), 7.36 (dd,  $J = 5.1, 1.1$  Hz, 1H), 7.12 (dd,  $J = 5.1, 3.7$  Hz, 1H), 3.93 (s, 3H).  $^{13}\text{C}$  NMR (101 MHz,  $\text{CDCl}_3$ )  $\delta$  166.7, 143.0, 138.6, 130.2, 128.7, 128.3, 126.3, 125.5, 124.5, 52.1.

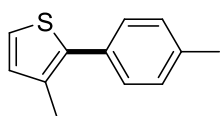

**3-methyl-2-p-tolylthiophene (3i)**<sup>9</sup>:  $^1\text{H}$  NMR (400 MHz,  $\text{CDCl}_3$ )  $\delta$  7.35 (d,  $J = 7.7$  Hz, 2H), 7.19 (dd,  $J = 15.4, 6.5$  Hz, 3H), 6.91 (d,  $J = 5.1$  Hz, 1H), 2.38 (s,

3H), 2.31 (s, 3H).  $^{13}\text{C}$  NMR (101 MHz,  $\text{CDCl}_3$ )  $\delta$  137.8, 136.8, 132.6, 131.7, 130.9, 129.0, 128.7, 122.8, 21.0, 14.7.

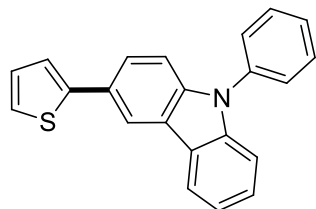

**9-phenyl-3-(thiophen-2-yl)-9H-carbazole (3j):**  $^1\text{H}$  NMR (400 MHz,  $\text{CDCl}_3$ )  $\delta$  8.35 (d,  $J = 1.5$  Hz, 1H), 8.17 (d,  $J = 7.7$  Hz, 1H), 7.66 (dd,  $J = 8.5, 1.8$  Hz, 1H), 7.63 – 7.54 (m, 4H), 7.47 (dd,  $J = 11.5, 4.3$  Hz, 1H), 7.43 – 7.33 (m, 4H), 7.32 – 7.24 (m, 2H), 7.10 (dd,  $J = 5.1, 3.6$  Hz, 1H).  $^{13}\text{C}$  NMR (101 MHz,  $\text{CDCl}_3$ )  $\delta$  144.4, 140.2, 139.2, 136.3, 128.8, 126.9, 126.5, 125.9, 125.6, 125.2, 123.4, 122.7, 122.7, 122.1, 121.1, 119.4, 119.0, 116.7, 109.0, 108.8; **HRMS** (EI): calcd. for  $\text{C}_{22}\text{H}_{25}\text{NS}$  [ $\text{M}^+$ ] 325.0920; found 325.0919.

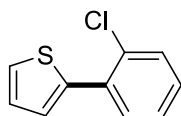

**2-(2-chlorophenyl)thiophene (3k)**<sup>10</sup>:  $^1\text{H}$  NMR (400 MHz,  $\text{CDCl}_3$ )  $\delta$  7.56 – 7.50 (m, 1H), 7.46 (dd,  $J = 7.7, 1.6$  Hz, 1H), 7.40 – 7.33 (m, 2H), 7.29 – 7.20 (m, 2H), 7.14 – 7.07 (m, 1H).  $^{13}\text{C}$  NMR (101 MHz,  $\text{CDCl}_3$ )  $\delta$  140.0, 133.0, 132.2, 131.3, 130.3, 128.5, 127.5, 126.9, 126.0.

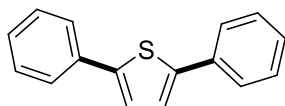

**2,5-diphenylthiophene (5a)**<sup>11</sup>:  $^1\text{H}$  NMR (400 MHz,  $\text{CDCl}_3$ )  $\delta$  7.63 (d,  $J = 7.6$  Hz, 4H), 7.39 (t,  $J = 7.8$  Hz, 4H), 7.32 – 7.25 (m, 4H).  $^{13}\text{C}$  NMR (101 MHz,  $\text{CDCl}_3$ )  $\delta$  143.5, 134.2, 128.8, 127.4, 125.5, 123.9.

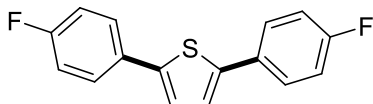

**2,5-bis(4-fluorophenyl)thiophene (5b)**<sup>12</sup>:  $^1\text{H}$  NMR (400 MHz,  $\text{CDCl}_3$ )  $\delta$  7.61 – 7.53 (m, 4H), 7.20 (s, 2H), 7.13 – 7.04 (m, 4H).  $^{13}\text{C}$  NMR (101 MHz,  $\text{CDCl}_3$ )  $\delta$  163.5, 161.0, 142.4, 130.4, 130.4, 127.2, 127.2, 123.9, 116.0, 115.7.

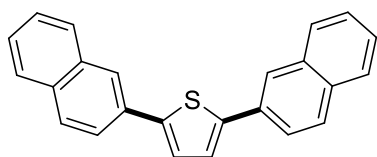

**2,5-di(naphthalen-2-yl)thiophene (5c)**<sup>13</sup>: <sup>1</sup>H NMR (400 MHz, CDCl<sub>3</sub>) δ 8.11 (s, 2H), 7.83 (ddd, *J* = 12.4, 10.3, 5.1 Hz, 8H), 7.58

– 7.41 (m, 6H). <sup>13</sup>C NMR (101 MHz, CDCl<sub>3</sub>) δ 143.8, 133.6, 132.7, 131.6, 128.5, 128.0, 127.7, 126.6, 126.0, 124.5, 123.9, 123.9.

After being dried, the product was found with poor solubility in the usual deuterated solvents.

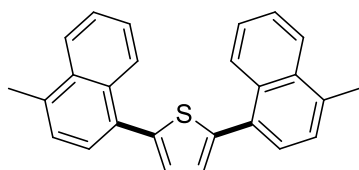

**2,5-bis(4-methylnaphthalen-1-yl)thiophene (5d)**: <sup>1</sup>H NMR (400 MHz, CDCl<sub>3</sub>) δ 8.54 – 8.34 (m, 2H), 8.12 – 8.03 (m, 2H), 7.63 –

7.50 (m, 6H), 7.38 (d, *J* = 7.2 Hz, 2H), 7.27 (d, *J* = 13.7 Hz, 2H), 2.74 (d, *J* = 10.1 Hz, 6H). <sup>13</sup>C NMR (101 MHz, CDCl<sub>3</sub>) δ 141.8, 134.5, 132.6, 131.5, 130.4, 127.6, 127.2, 126.2, 125.8, 125.6, 124.2, 19.4.

**HRMS** (EI): calcd. for C<sub>26</sub>H<sub>20</sub>S [M<sup>+</sup>] 364.1278; found 364.1280.

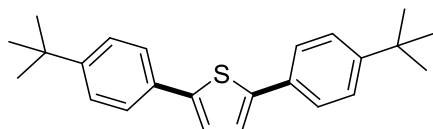

**5-bis(4-tert-butylphenyl)thiophene (5e)**<sup>14</sup>: <sup>1</sup>H NMR (400

MHz, CDCl<sub>3</sub>) δ 7.56 (d, *J* = 8.4 Hz, 4H), 7.40 (d, *J* = 8.4 Hz, 4H), 7.24 (s, 2H), 1.34 (s, 18H). <sup>13</sup>C NMR (101 MHz, CDCl<sub>3</sub>) δ 150.5, 143.1, 131.6, 125.7, 125.3, 123.5, 34.6, 31.2.

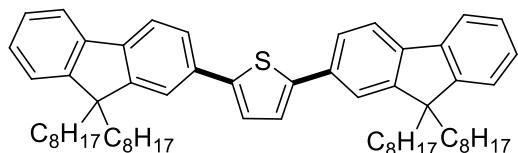

**2,5-bis(9,9-dioctyl-9H-fluoren-2-yl)thiophene (5f)**:

<sup>1</sup>H NMR (400 MHz, CDCl<sub>3</sub>) δ 7.75 (d, *J* = 7.7 Hz, 4H), 7.69 (dd, *J* = 7.9, 1.3 Hz, 2H), 7.64 (s, 2H), 7.42 (s, 2H), 7.41 – 7.30 (m, 6H), 2.16 – 1.93 (m, 8H), 1.27 – 1.01 (m, 40H), 0.84 (t, *J* = 7.1 Hz, 12H), 0.70 (d, *J* = 7.5 Hz, 8H). <sup>13</sup>C NMR (101 MHz, CDCl<sub>3</sub>) δ 151.6, 150.9, 144.1, 140.7, 133.2, 127.2, 126.9, 124.5, 123.8, 122.9, 120.1, 119.8, 55.2, 40.5, 31.9, 30.1, 29.3, 23.8, 22.7, 14.2; **HRMS** (EI): calcd. for C<sub>62</sub>H<sub>84</sub>S [M<sup>+</sup>] 860.6276; found 860.6288.



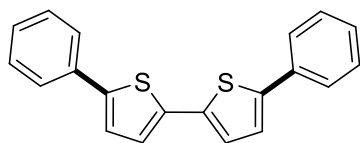

**5,5'-diphenyl-2,2'-bithiophene (7a)**<sup>11</sup>: <sup>1</sup>H NMR (400 MHz, CDCl<sub>3</sub>) δ 7.61 (d, *J* = 7.5 Hz, 4H), 7.39 (t, *J* = 7.6 Hz, 4H), 7.30 (d, *J* = 7.3 Hz, 2H), 7.24 (s, 2H), 7.18 (d, *J* = 3.7 Hz, 2H). <sup>13</sup>C NMR

(101 MHz, CDCl<sub>3</sub>) δ 143.0, 136.6, 133.9, 128.9, 127.6, 125.5, 124.47, 123.7.

After being dried, the product was found with poor solubility in the usual deuterated solvents.

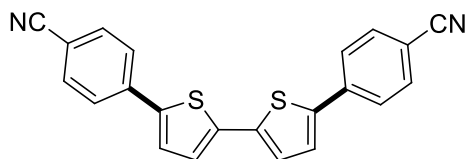

**4,4'-(2,2'-bithiophene-5,5'-diyl)dibenzonitrile (7b)**<sup>15</sup>:

<sup>1</sup>H NMR (400 MHz, CDCl<sub>3</sub>) δ 8.10 (d, *J* = 7.1 Hz, 2H),

7.69 (d, *J* = 0.8 Hz, 8H), 7.38 (d, *J* = 3.9 Hz, 2H). <sup>13</sup>C NMR (101 MHz, CDCl<sub>3</sub>) δ 141.2, 138.2, 138.0,

132.8, 126.0, 125.7, 125.4, 118.7, 110.7.

After being dried, the product was found with poor solubility in the usual deuterated solvents.

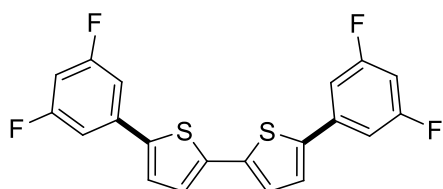

**5,5'-bis(3,5-difluorophenyl)-2,2'-bithiophene (7c)**: <sup>1</sup>H

NMR (400 MHz, CDCl<sub>3</sub>) δ 7.25 (d, *J* = 3.9 Hz, 2H), 7.18

(d, *J* = 3.8 Hz, 2H), 7.13 – 7.07 (m, 4H), 6.74 (tt, *J* = 8.8,

2.2 Hz, 2H). <sup>13</sup>C NMR (101 MHz, CDCl<sub>3</sub>) δ 164.6, 164.4, 162.1, 162.0, 140.8, 137.4, 136.8, 125.3,

124.9, 108.5, 108.4, 108.3, 108.2, 103.0, 102.8, 102.5; **HRMS** (EI):calcd. for C<sub>20</sub>H<sub>20</sub>F<sub>4</sub>S<sub>2</sub> [M<sup>+</sup>]

390.0155; found 390.0154.

After being dried, the product was found with poor solubility in the usual deuterated solvents.

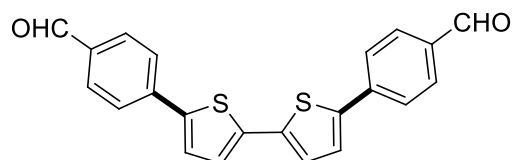

**4,4'-(2,2'-bithiophene-5,5'-diyl)dibenzaldehyde**

**(7d):**  $^1\text{H}$  NMR (400 MHz,  $\text{CDCl}_3$ )  $\delta$  10.02 (s, 2H),

8.10 (d,  $J = 6.9$  Hz, 2H), 7.91 (d,  $J = 8.2$  Hz, 4H), 7.77 (d,  $J = 8.2$  Hz, 4H), 7.43 (d,  $J = 3.9$  Hz, 2H).  $^{13}\text{C}$

NMR (101 MHz,  $\text{CDCl}_3$ )  $\delta$  191.3, 141.8, 139.4, 138.2, 135.1, 130.5, 125.9, 125.7, 125.3; **HRMS**

(EI):calcd. for  $\text{C}_{22}\text{H}_{14}\text{O}_2\text{S}_2$  [ $\text{M}^+$ ] 374.0436; found 374.0429.

After being dried, the product was found with poor solubility in the usual deuterated solvents.

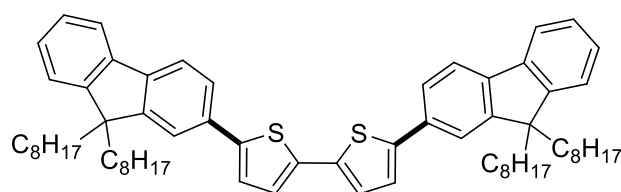

**5,5'-bis(9,9-dioctyl-9H-fluoren-2-yl)-2,2'**

**-bithiophene (7e):**  $^1\text{H}$  NMR (400 MHz,

$\text{CDCl}_3$ )  $\delta$  7.77 – 7.65 (m, 4H), 7.64 – 7.49

(m, 4H), 7.33 (dd,  $J = 4.6, 3.5$  Hz, 8H),

7.23 (d,  $J = 3.8$  Hz, 2H), 2.07 – 1.93 (m, 8H), 1.11 (dd,  $J = 29.6, 21.6$  Hz, 40H), 0.81 (t,  $J = 7.1$  Hz,

12H), 0.65 (d,  $J = 7.4$  Hz, 8H).  $^{13}\text{C}$  NMR (101 MHz,  $\text{CDCl}_3$ )  $\delta$  151.6, 150.9, 143.9, 140.9, 140.6, 136.5,

132.8, 127.2, 126.9, 124.5, 123.6, 122.9, 120.1, 119.8, 55.2, 40.4, 31.8, 30.1, 29.8, 29.3, 23.8, 22.7,

14.1; **HRMS** (EI):calcd. for  $\text{C}_{66}\text{H}_{86}\text{S}_2$  [ $\text{M}^+$ ] 942.6164; found 942.6165.

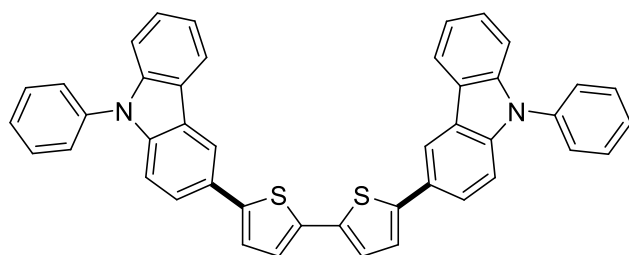

**5,5'-bis(9-phenyl-9H-carbazol-3-yl)-2,2'**

**-bithiophene (7f):**  $^1\text{H}$  NMR (400 MHz,

$\text{CDCl}_3$ )  $\delta$  8.38 (d,  $J = 1.5$  Hz, 2H), 8.20 (d,

$J = 7.7$  Hz, 2H), 7.70 – 7.57 (m, 10H), 7.46 (dt,  $J = 13.8, 7.8$  Hz, 8H), 7.36 – 7.29 (m, 4H), 7.23 (d,  $J =$

3.7 Hz, 2H).  $^{13}\text{C}$  NMR (101 MHz,  $\text{CDCl}_3$ )  $\delta$  144.0, 141.3, 140.4, 137.4, 135.9, 129.9, 127.6, 127.0,

126.4, 126.3, 124.2, 124.1, 123.8, 123.2, 122.8, 120.4, 120.2, 117.4, 110.1, 109.9; **HRMS** (EI):calcd.

for  $\text{C}_{44}\text{H}_{28}\text{N}_2\text{S}_2$  [ $\text{M}^+$ ] 648.1692; found 648.1688.

After being dried, the product was found with poor solubility in the usual deuterated solvents.

## References

1. H. Jullien, B. Quiclet-Sire, T. T éart and S. Z. Zard, *Org. Lett.*, 2013, **16**, 302-305.
2. M. Baghbanzadeh, C. Pilger and C. O. Kappe, *J. Org. Chem.*, 2011, **76**, 8138-8142.
3. L. Chen, J. Roger, C. Bruneau, P. H. Dixneuf and H. Doucet, *Chem. Commun.*, 2011, **47**, 1872-1874.
4. L. A. Estrada, V. A. Montes, G. Zyryanov and P. Anzenbacher, *J. Chem. Phys. B.*, 2007, **111**, 6983-6986.
5. C. M. So, H. W. Lee, C. P. Lau and F. Y. Kwong, *Org. Lett.*, 2008, **11**, 317-320.
6. S. E. Denmark and J. D. Baird, *Org. Lett.*, 2006, **8**, 793-795.
7. L. Liu, C.-L. Ho, W.-Y. Wong, K.-Y. Cheung, M.-K. Fung, W.-T. Lam, A. B. Djurišić and W.-K. Chan, *Adv. Funct. Mater.*, 2008, **18**, 2824-2833.
8. P. Leowanawat, N. Zhang, A.-M. Resmerita, B. M. Rosen and V. Percec, *J. Org. Chem.*, 2011, **76**, 9946-9955.
9. S. Tanaka, D. Tanaka, G. Tatsuta, K. Murakami, S. Tamba, A. Sugie and A. Mori, *Chem-Eur. J.*, 2013, **19**, 1658-1665.
10. M. Shiozaki, H. Imai, K. Maeda, T. Miura, K. Yasue, A. Suma, M. Yokota, Y. Ogoshi, J. Haas, A. M. Fryer, E. R. Laird, N. M. Littmann, S. W. Andrews, J. A. Josey, T. Mimura, Y. Shinozaki, H. Yoshiuchi and T. Inaba, *Bioorg. Med. Chem. Lett.*, 2009, **19**, 6213-6217.
11. C. Moreno Castro, M. C. Ruiz Delgado, V. Hernández, S. Hotta, J. Casado and J. T. López Navarrete, *J. Chem. Phys.*, 2002, **116**, 10419-10427.
12. H. Jiang, W. Zeng, Y. Li, W. Wu, L. Huang and W. Fu, *J. Org. Chem.*, 2012, **77**, 5179-5183.
13. F. Balzer, M. Schiek, A. Osadnik, I. Wallmann, J. Parisi, H.-G. Rubahn and A. Lutzen, *Phys. Chem. Chem. Phys.*, 2014, **16**, 5747-5754.
14. H. Bestmann and W. Schaper, *Tetrahedron. Lett.*, 1979, **3**, 243-4.
15. W. Porzio, S. Destri, M. Pasini, A. Rapallo, U. Giovanella, B. Vercelli and M. Campione, *Cryst. Growth. Des.*, 2006, **6**, 1497-1503.

# Copies of Product $^1\text{H}$ NMR and $^{13}\text{C}$ NMR

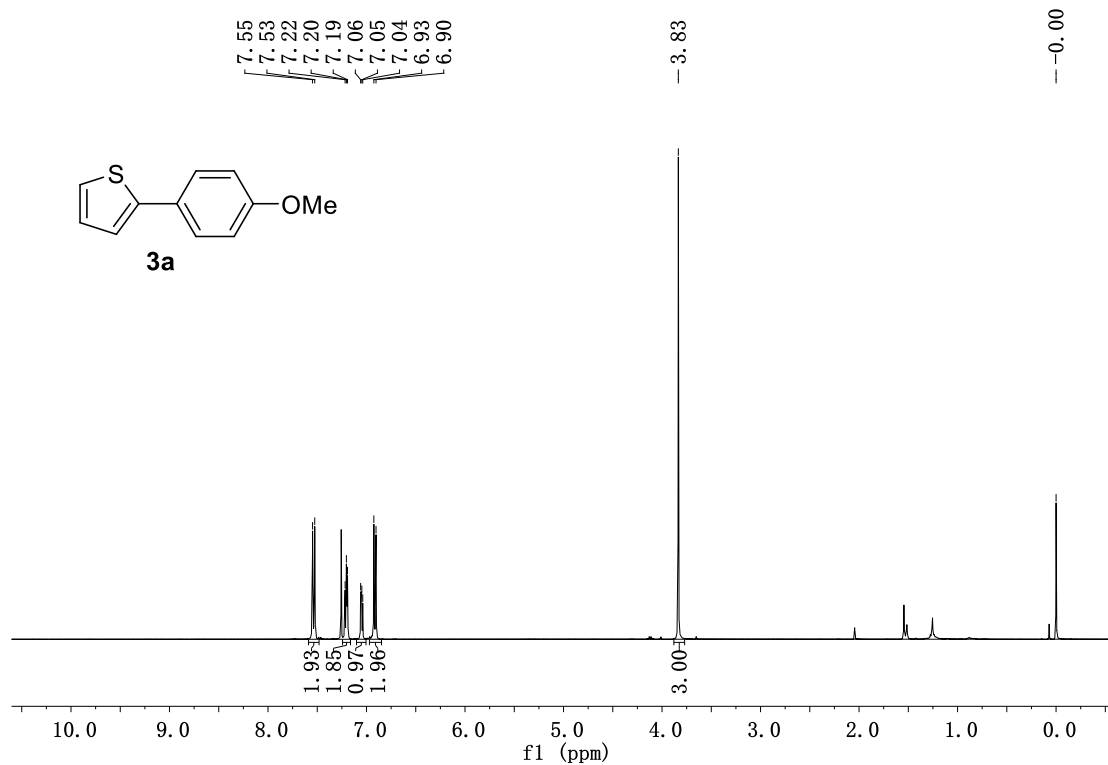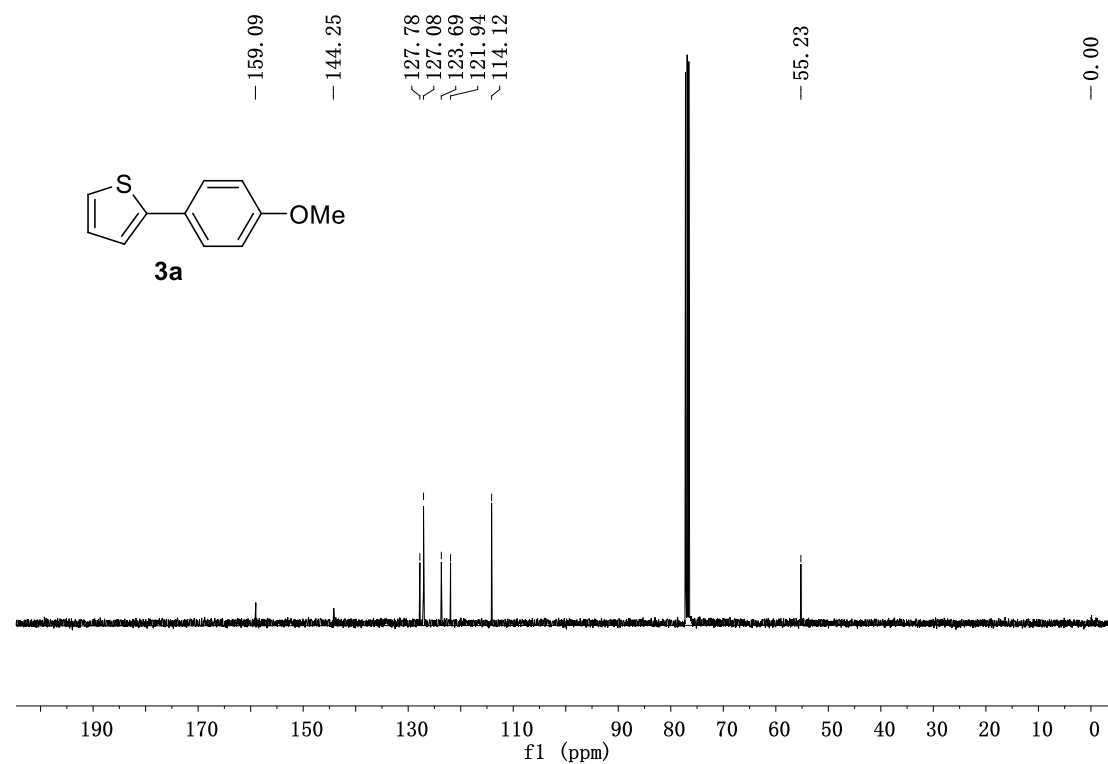

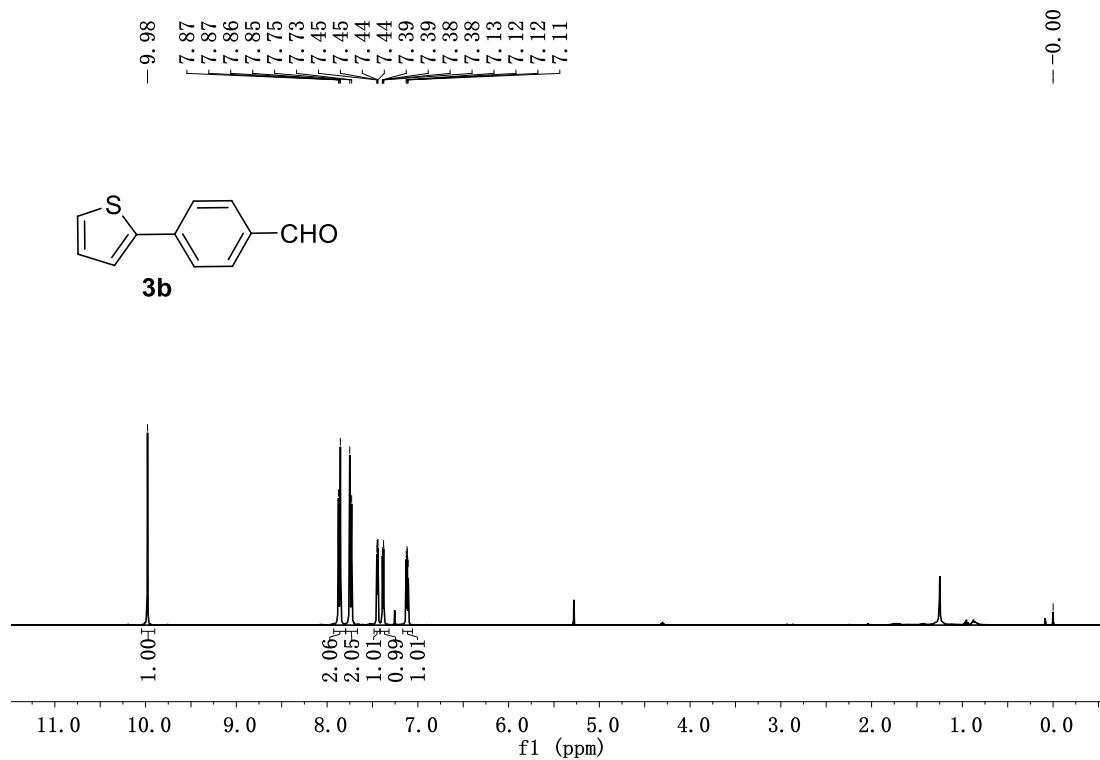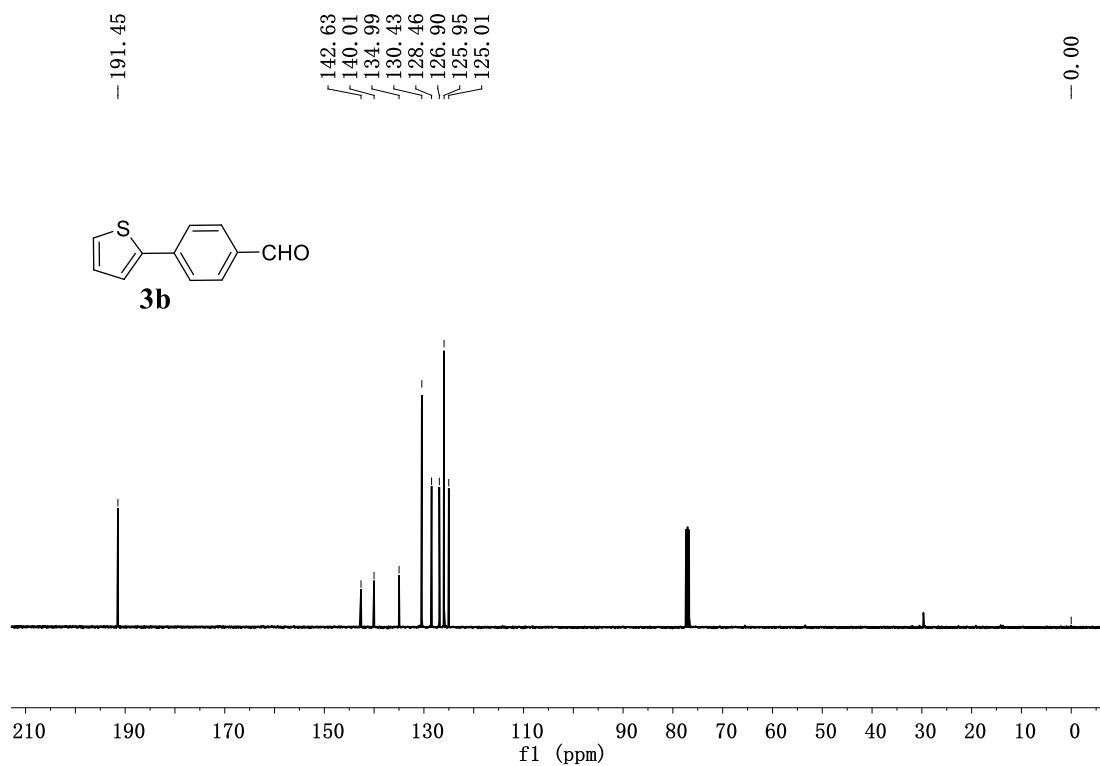

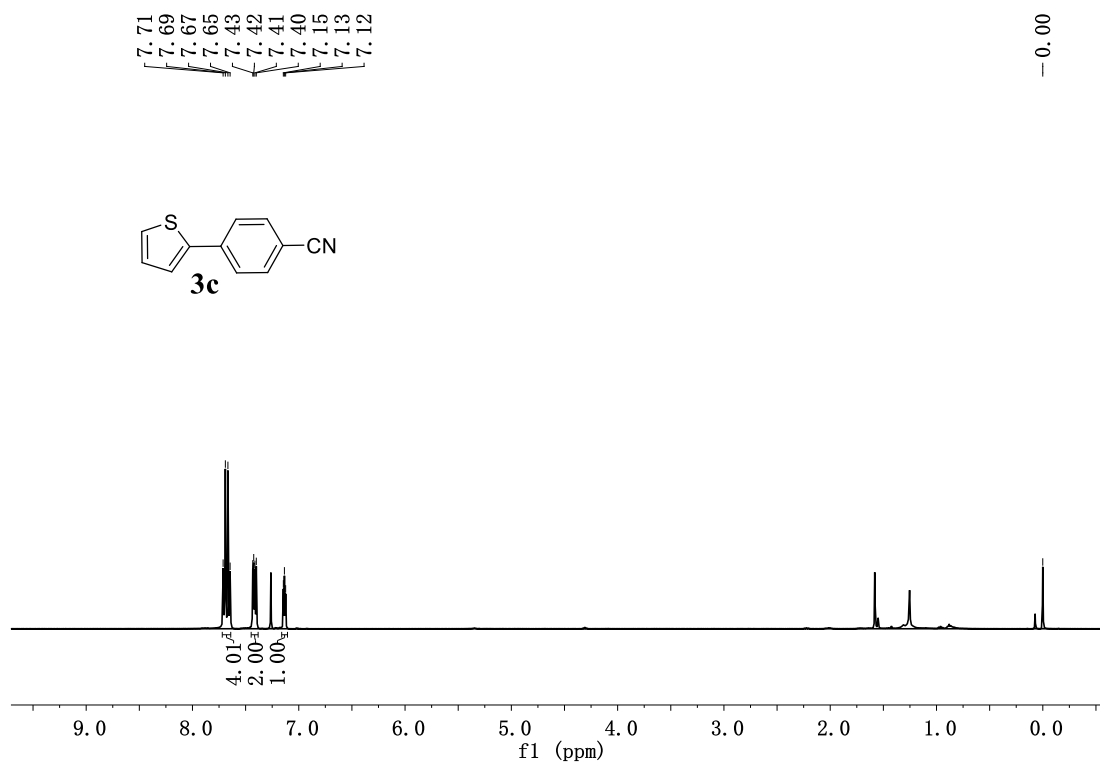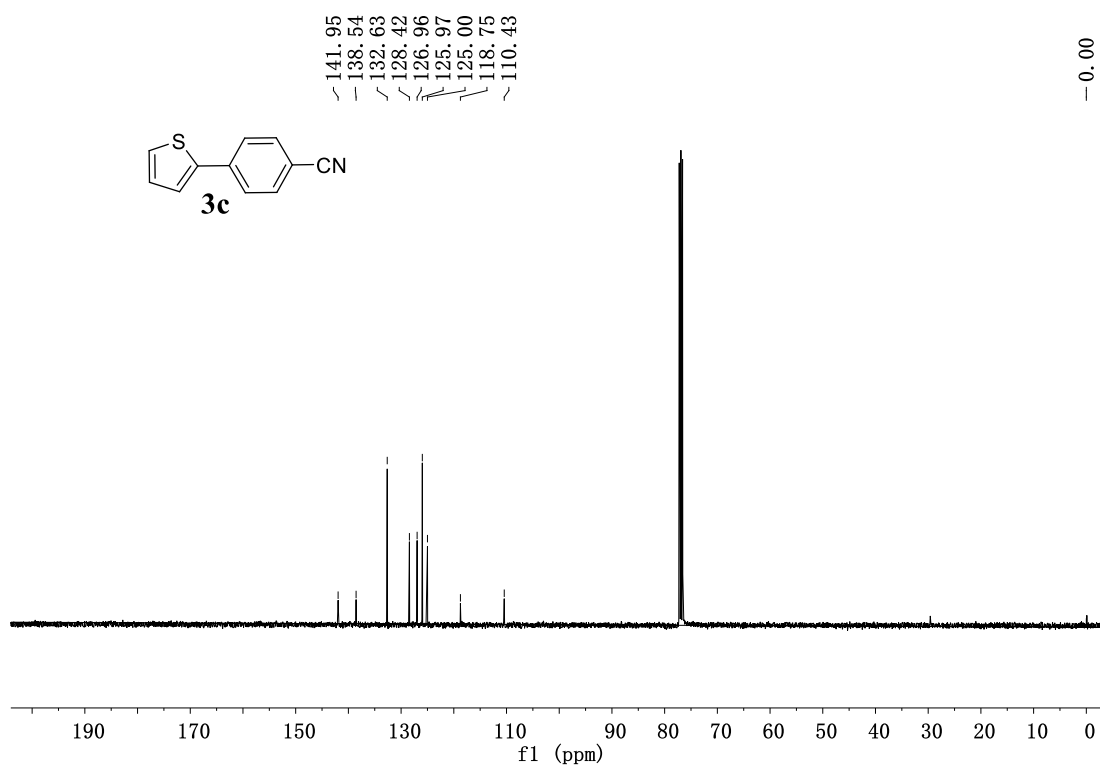

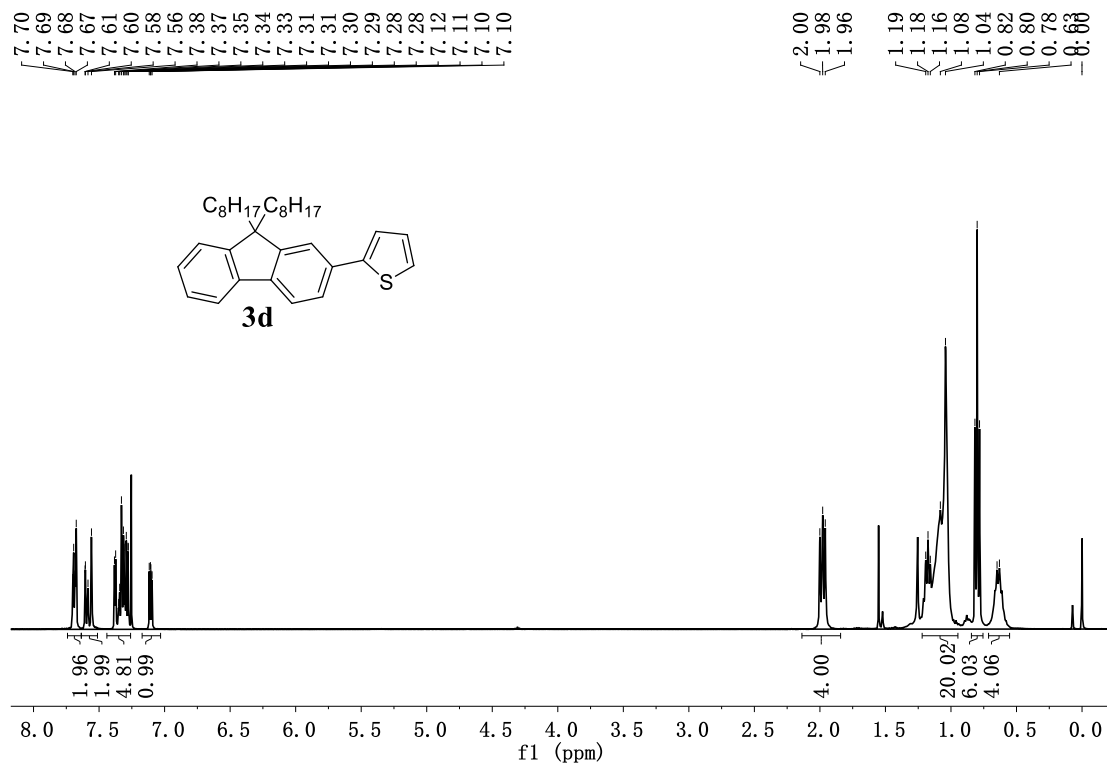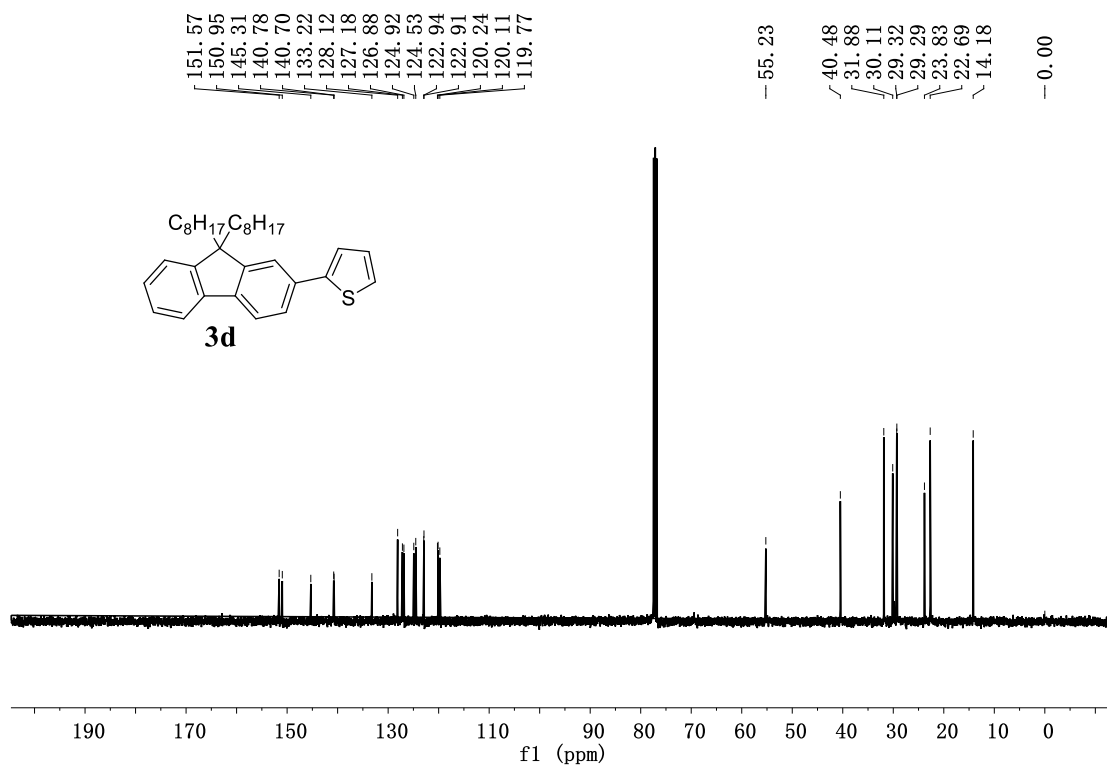

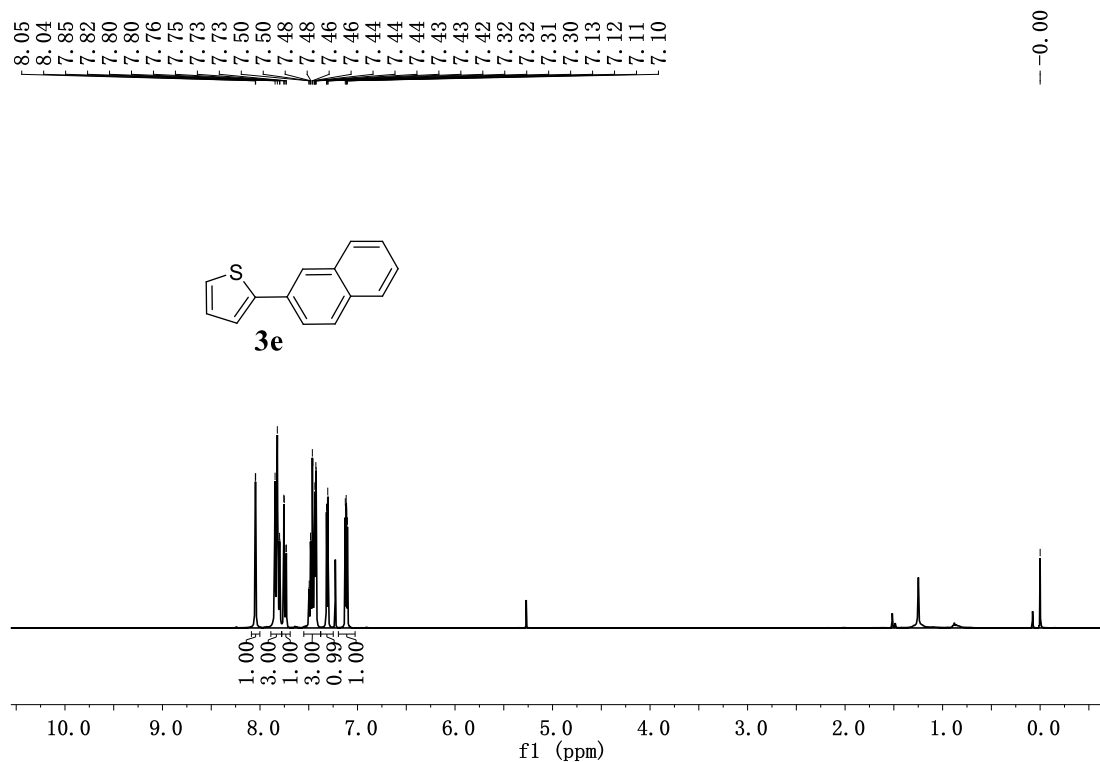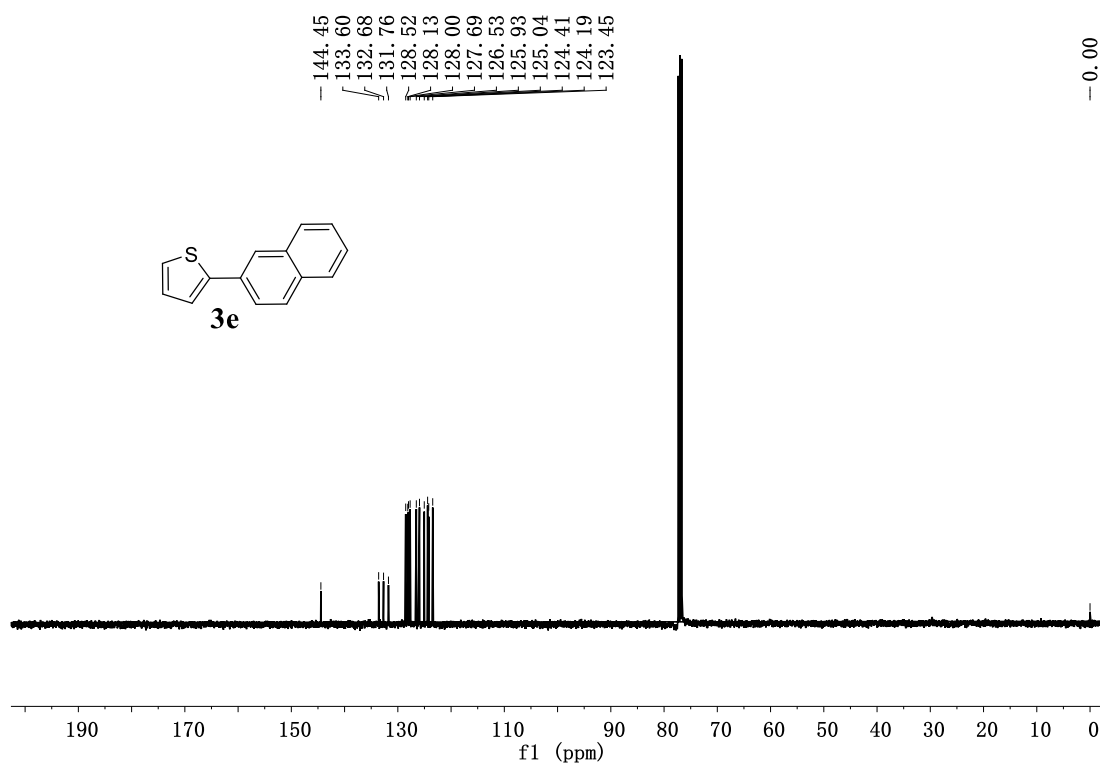



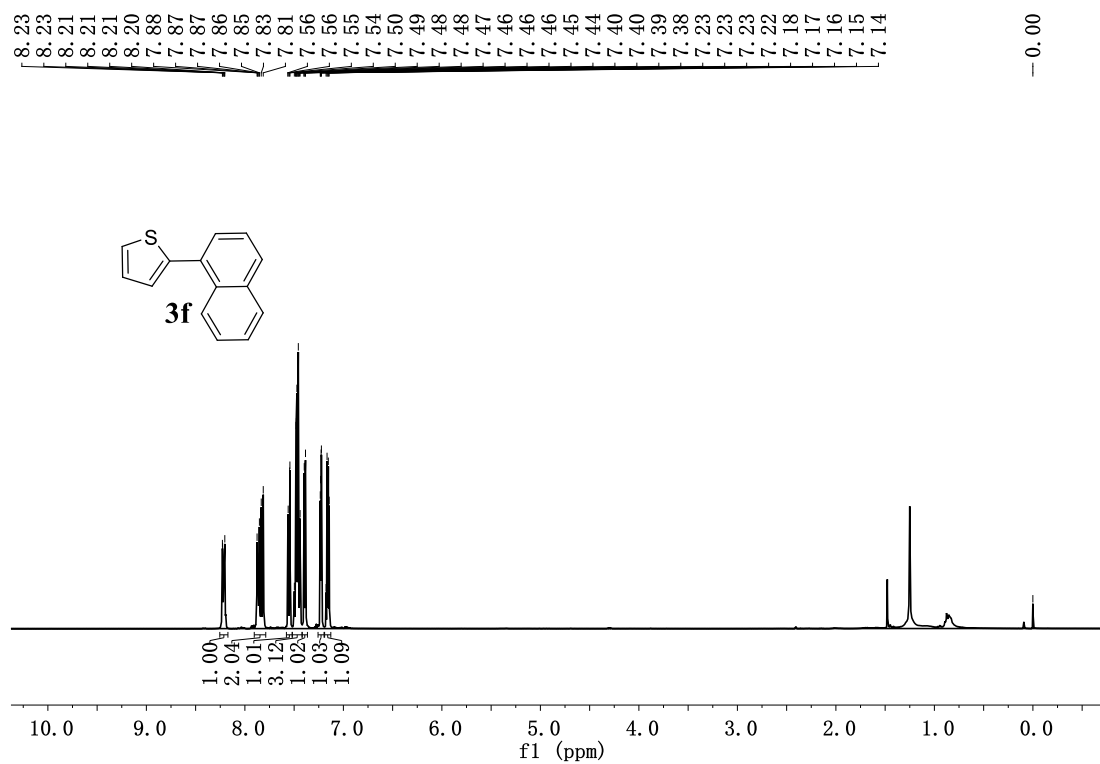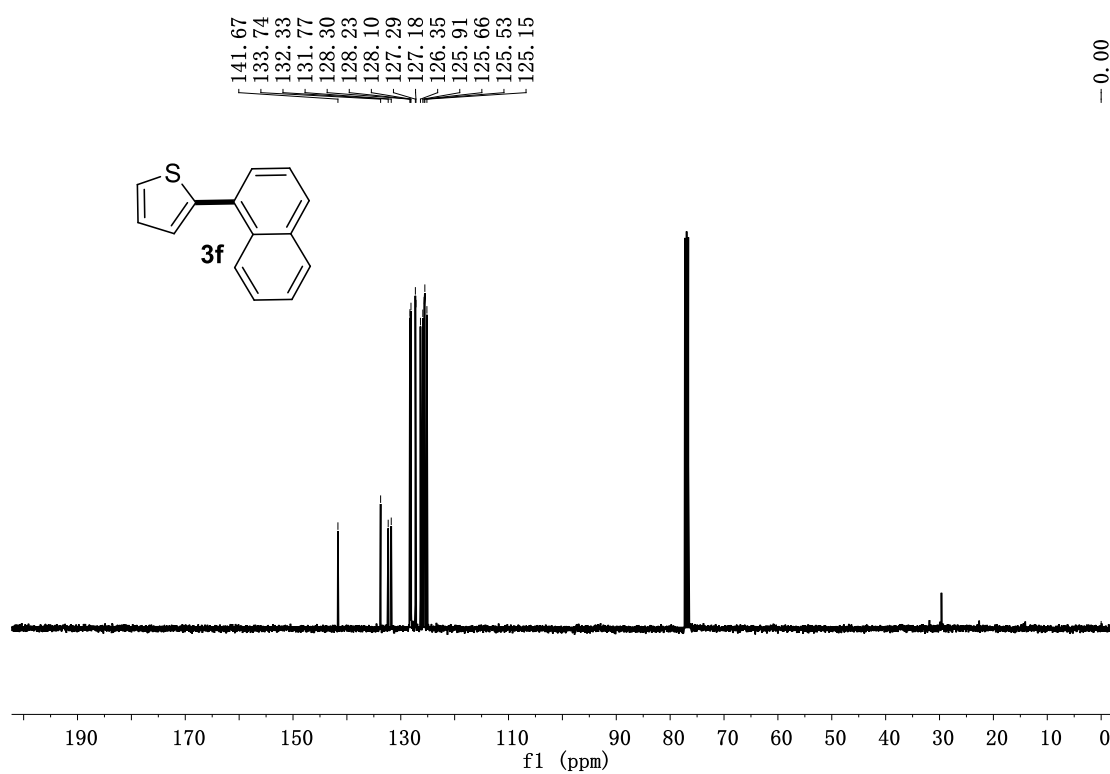

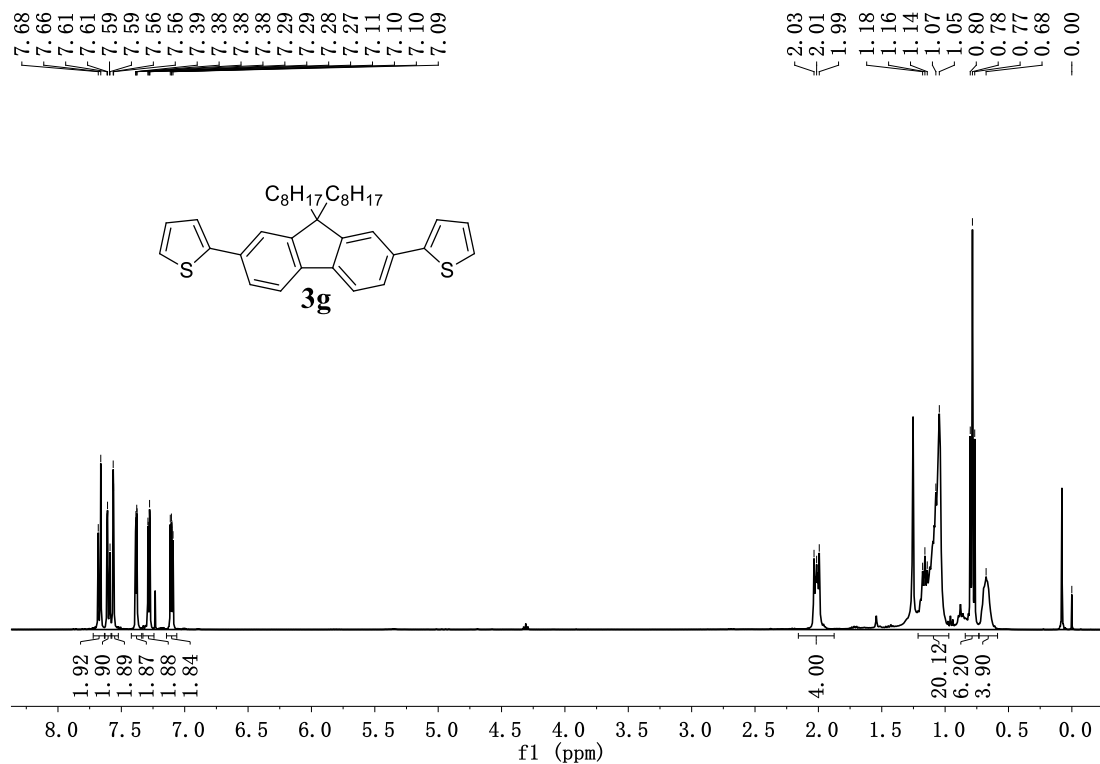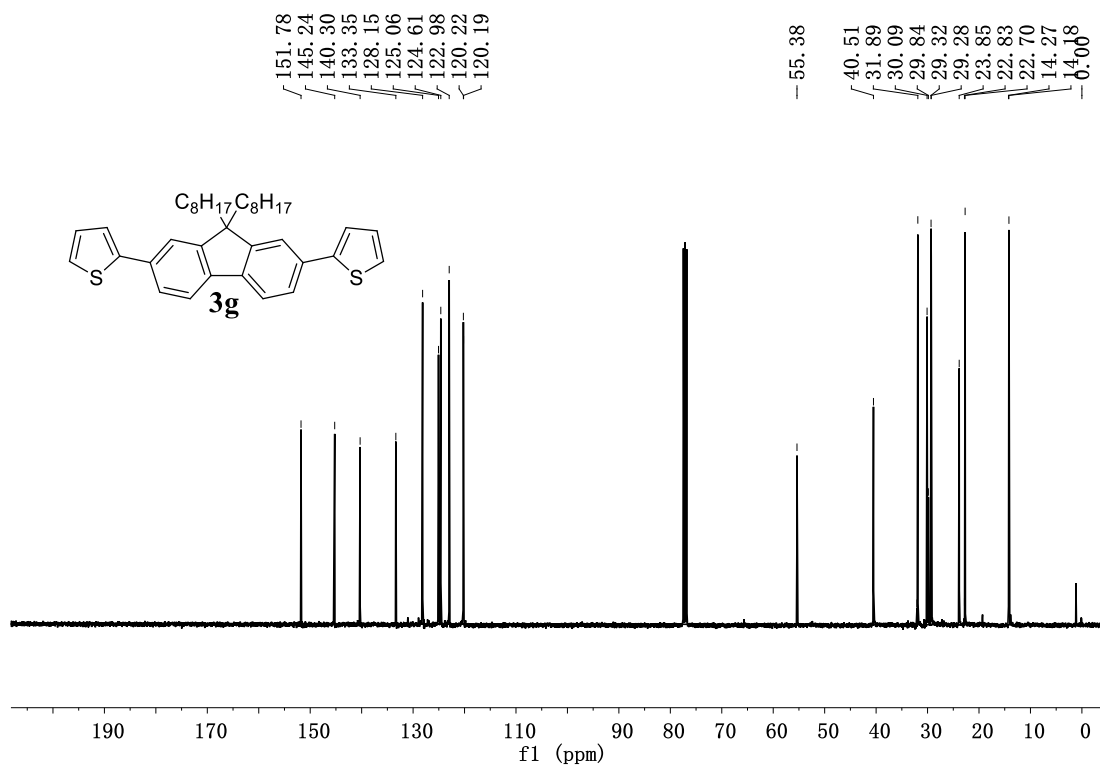

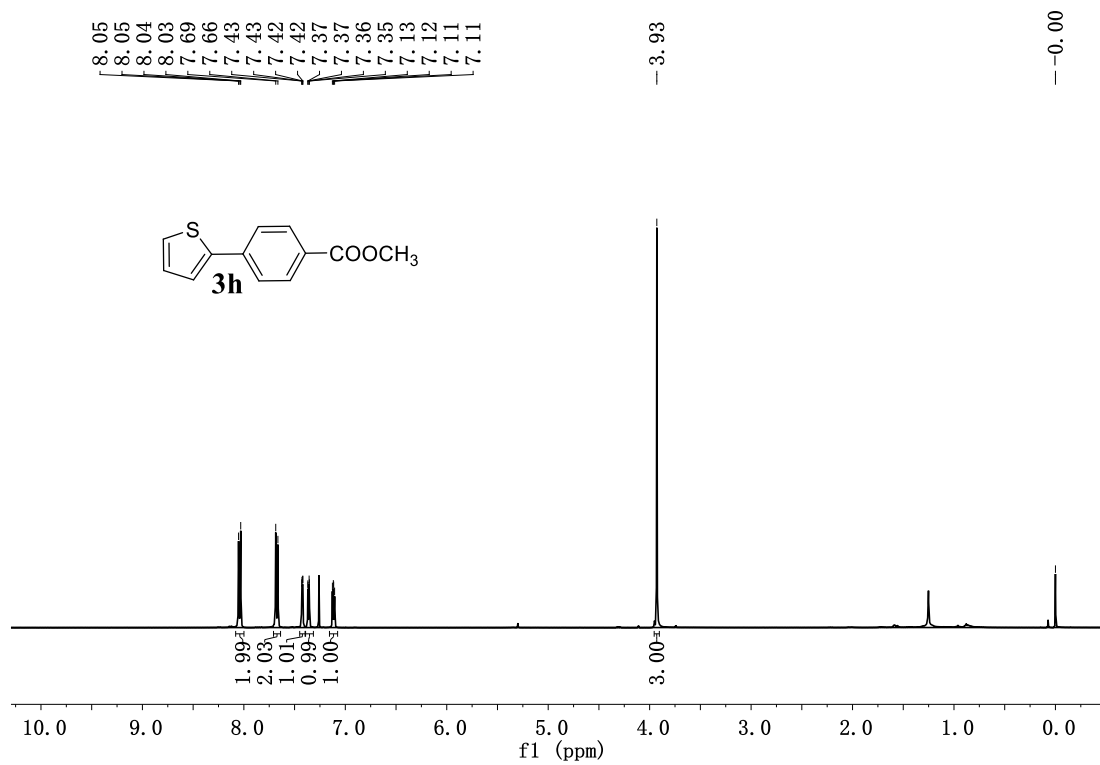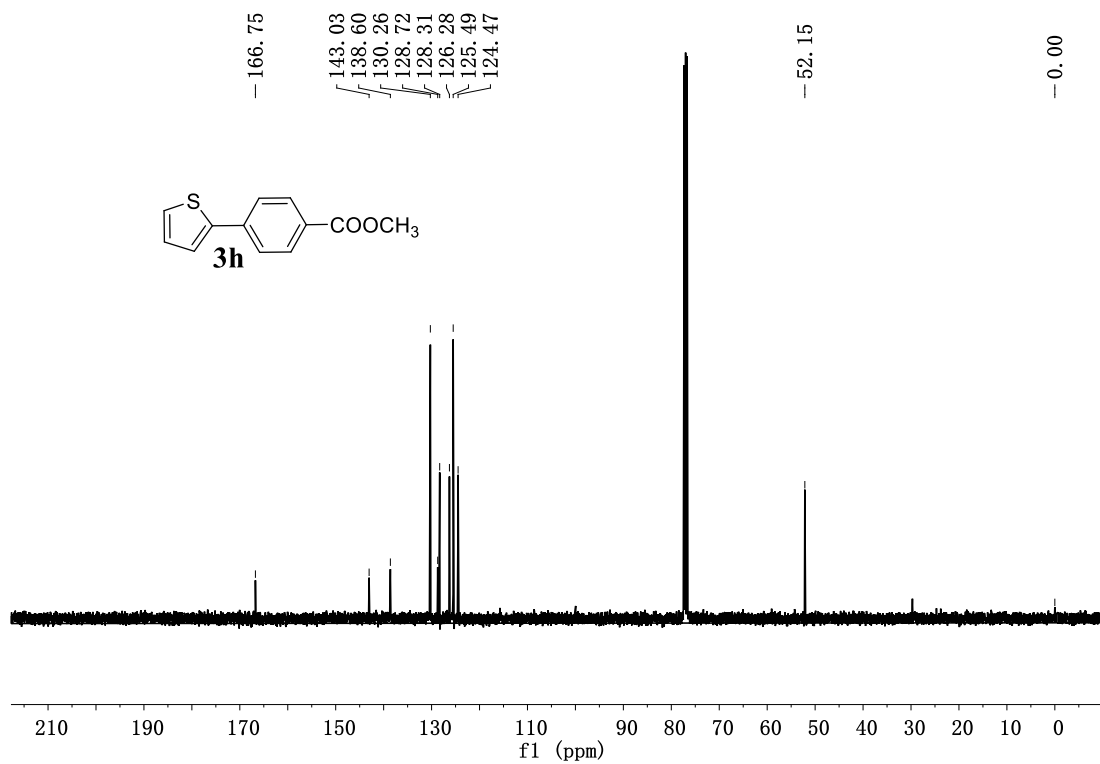

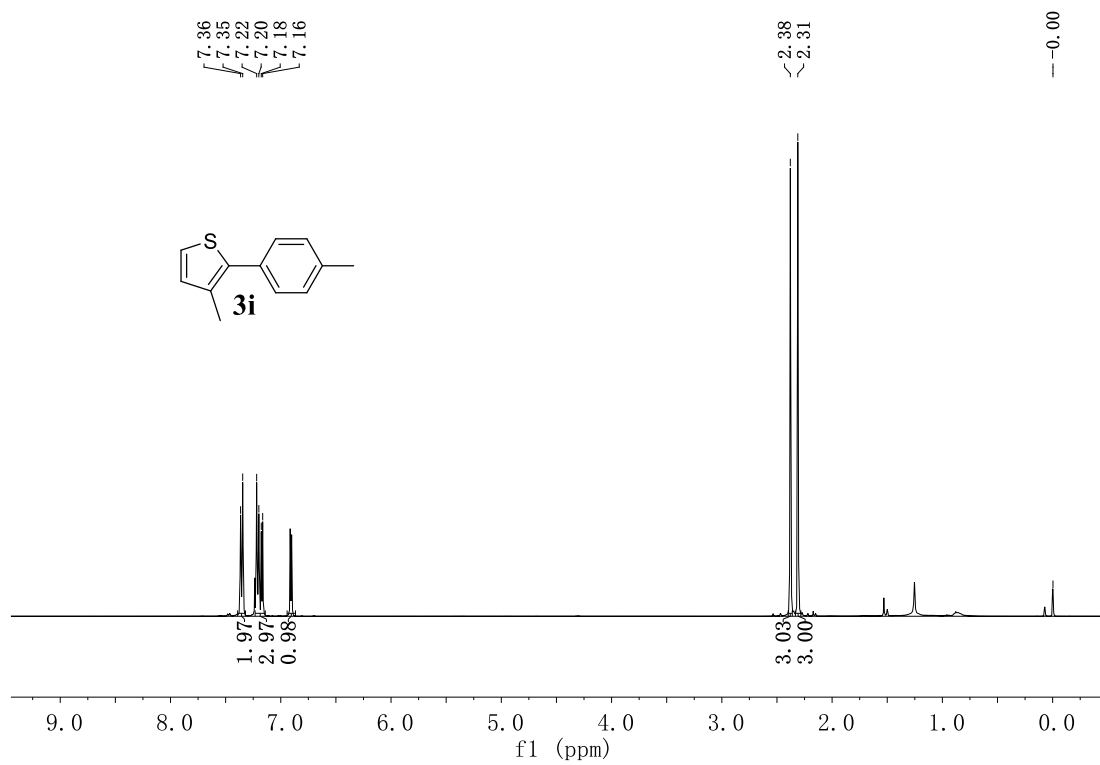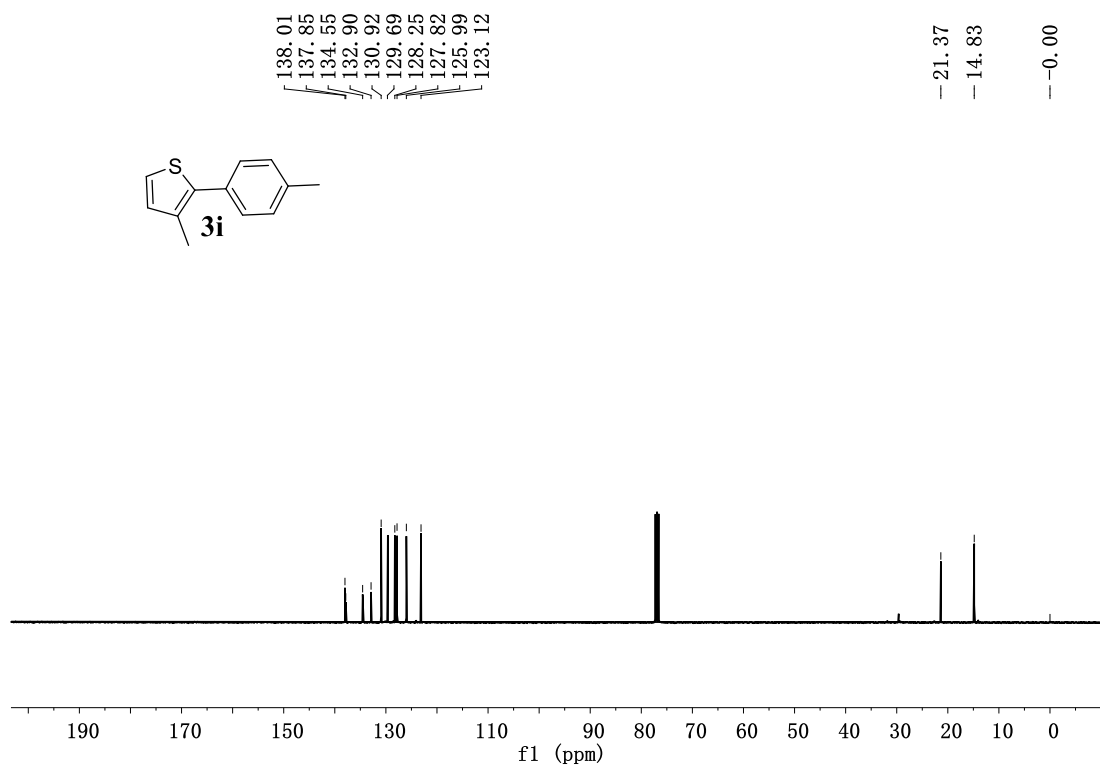

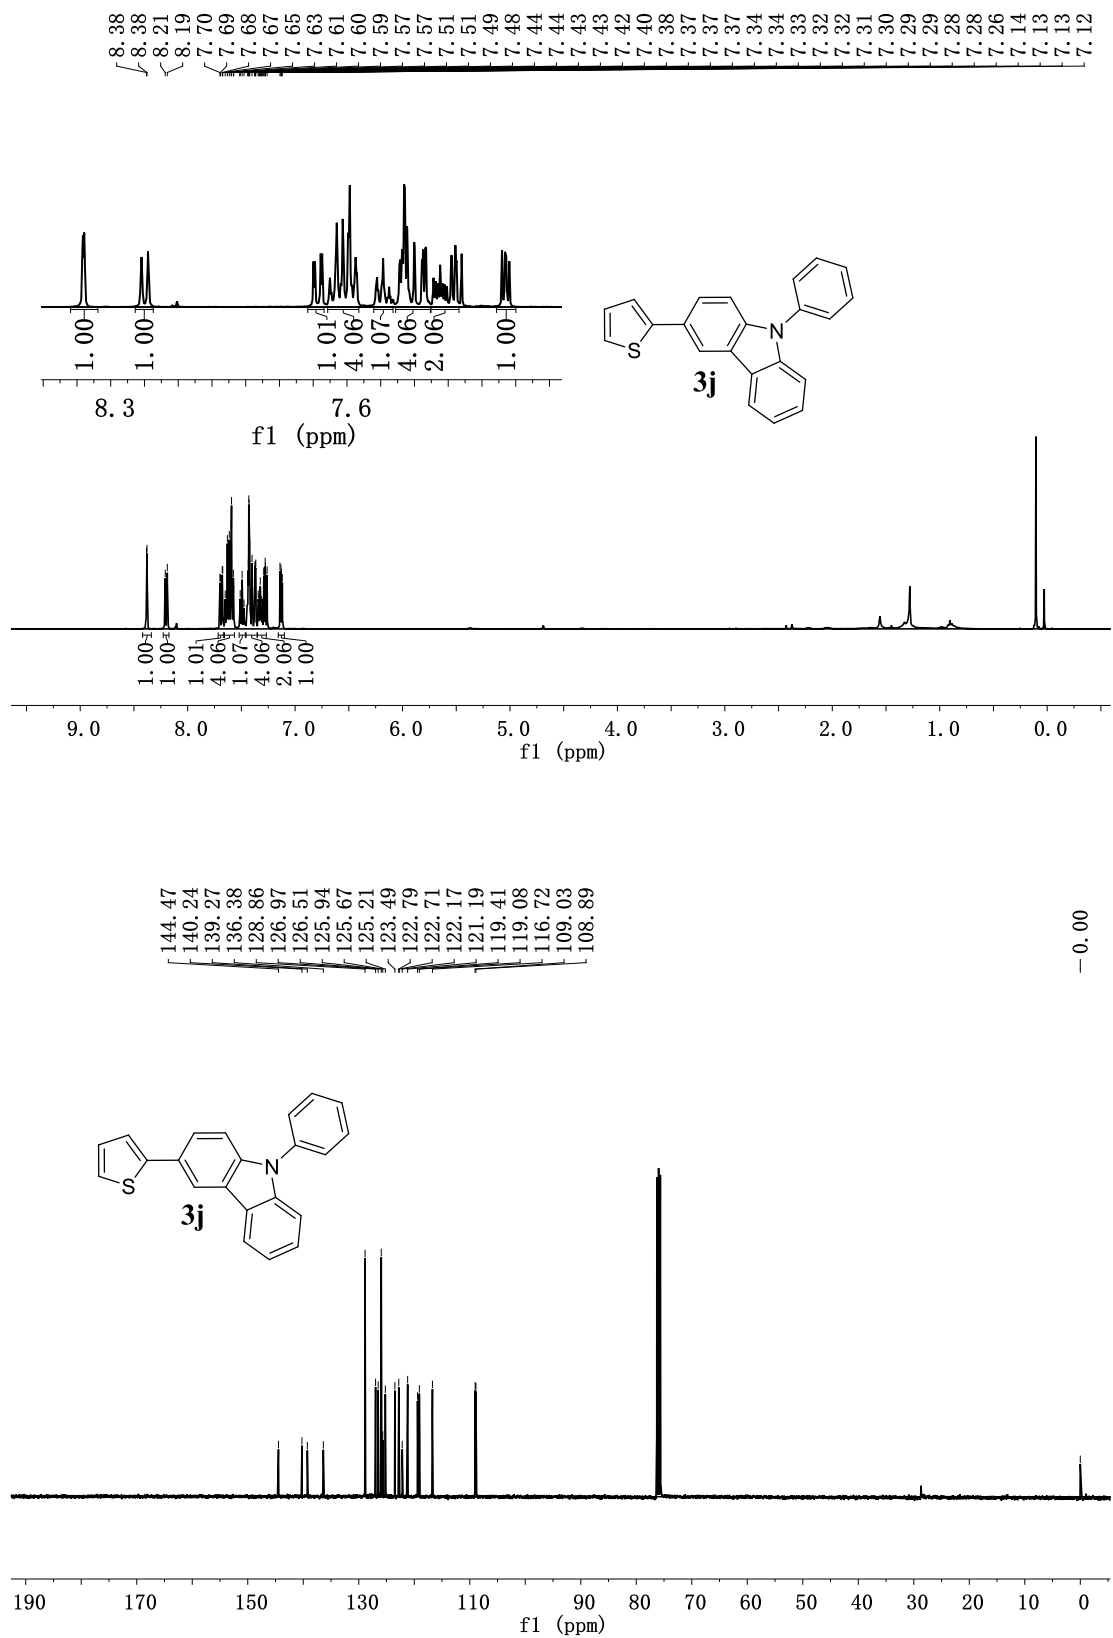

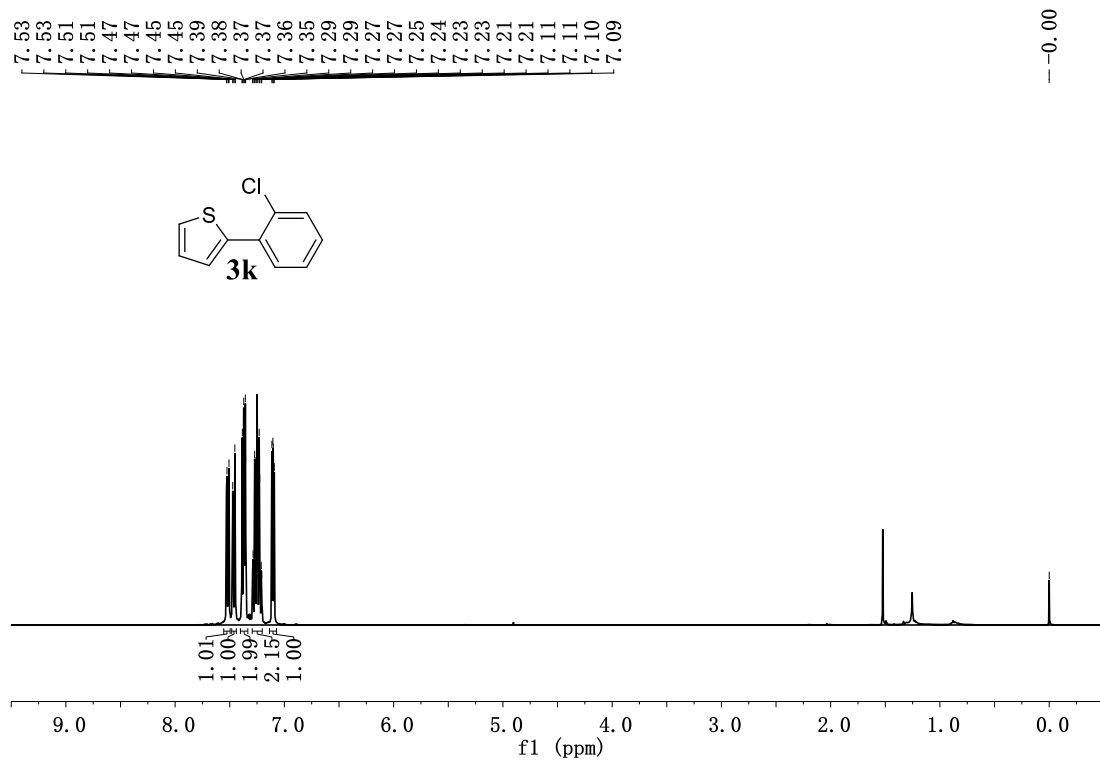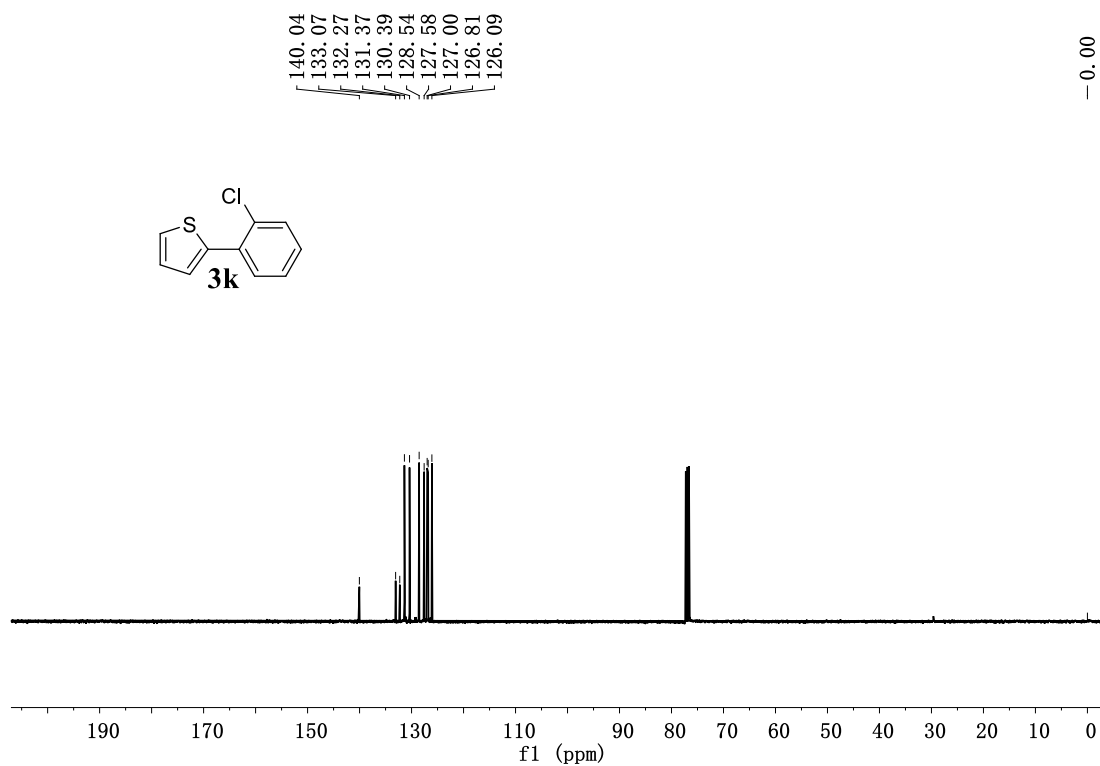

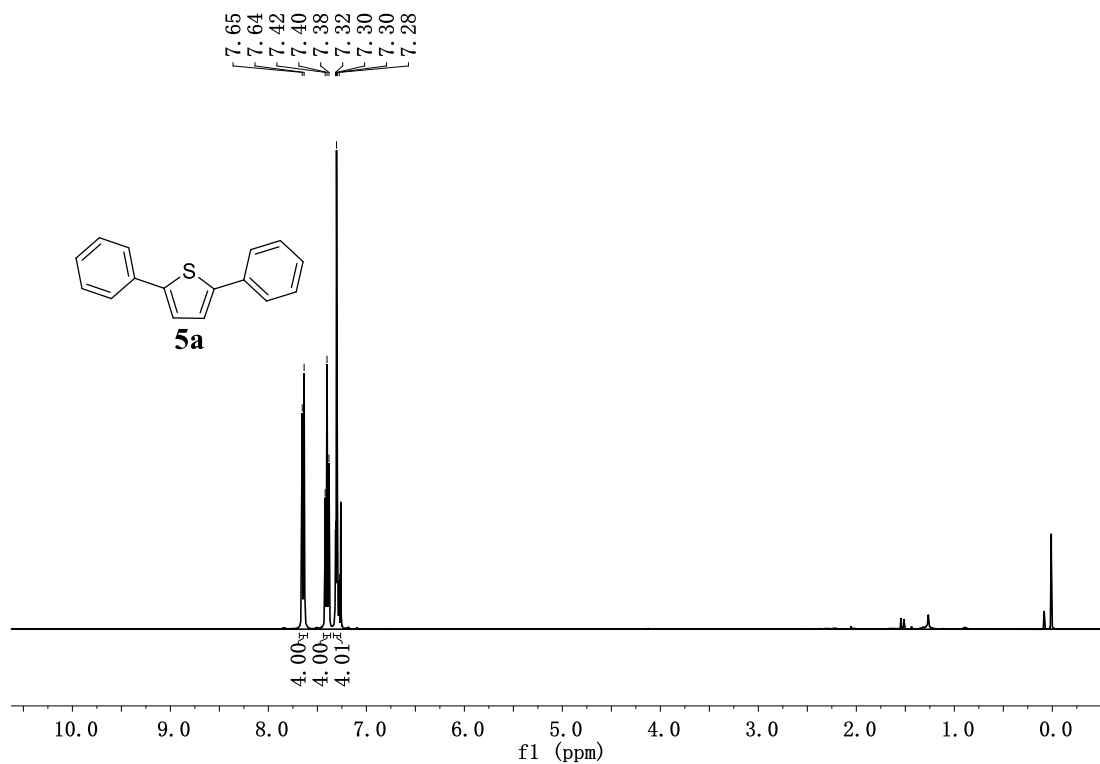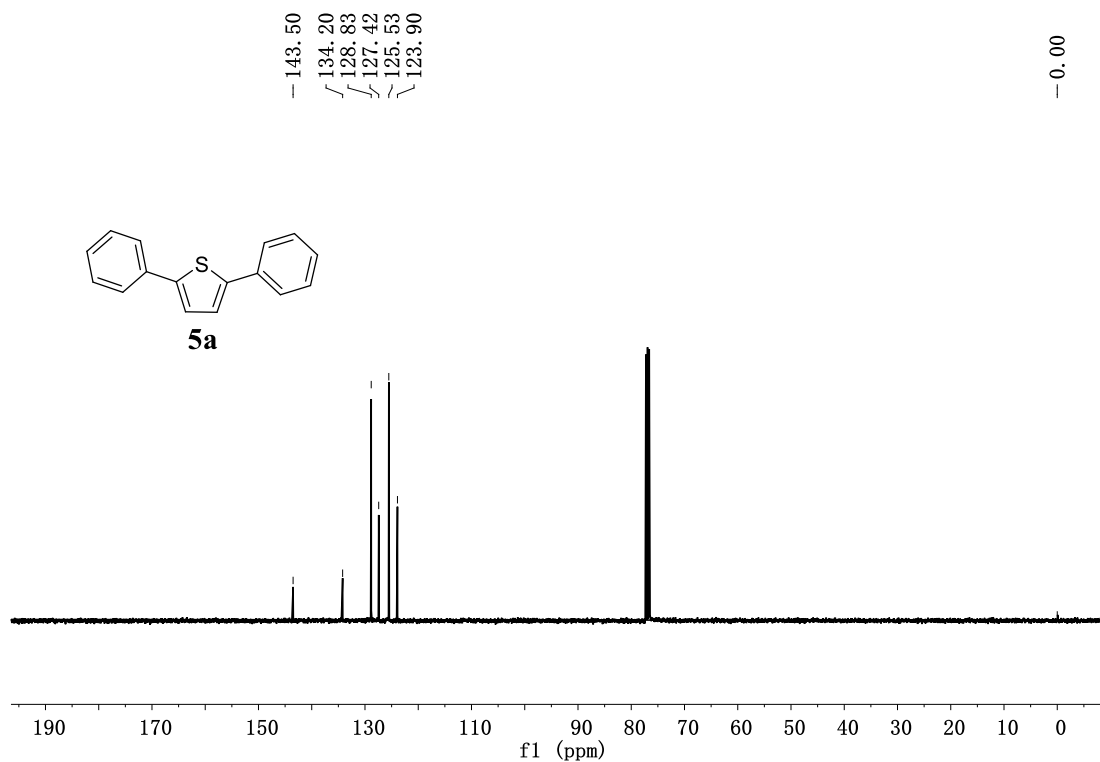

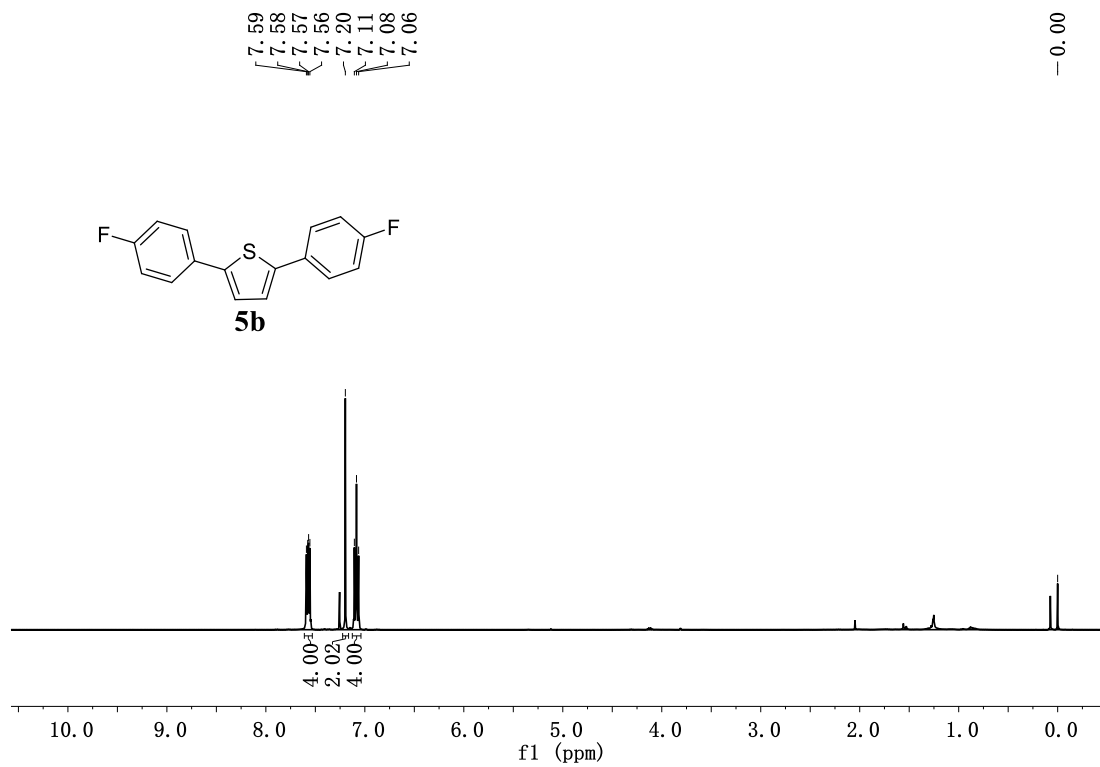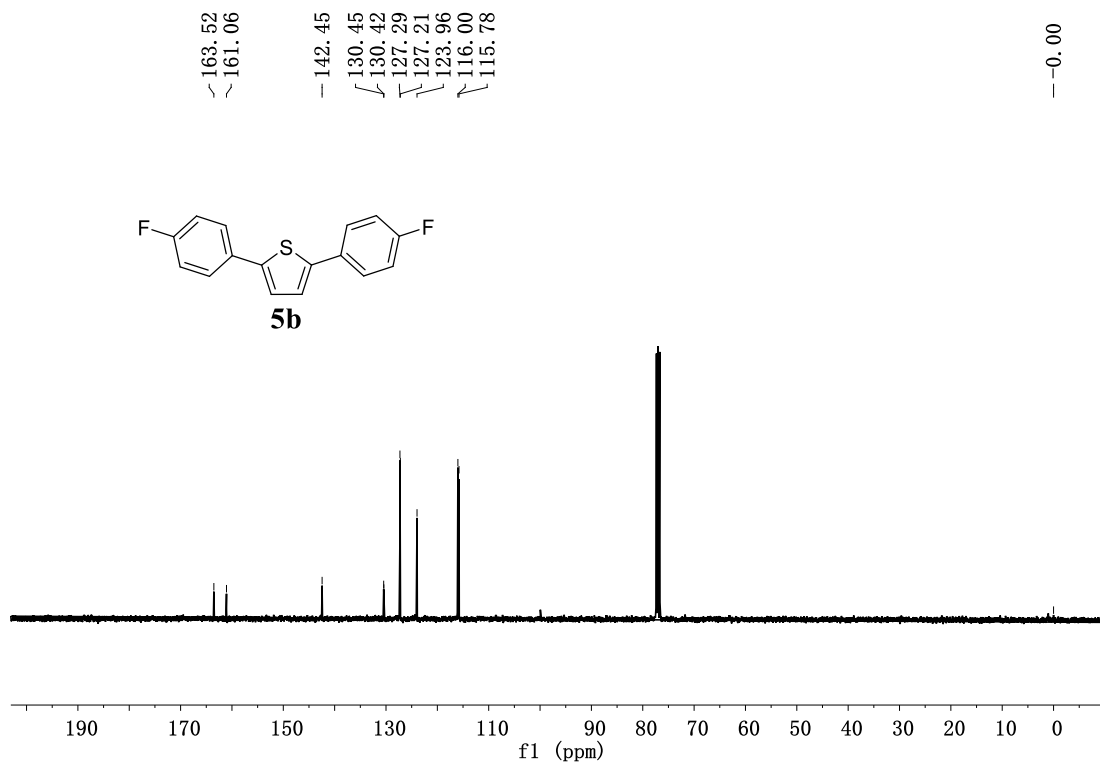



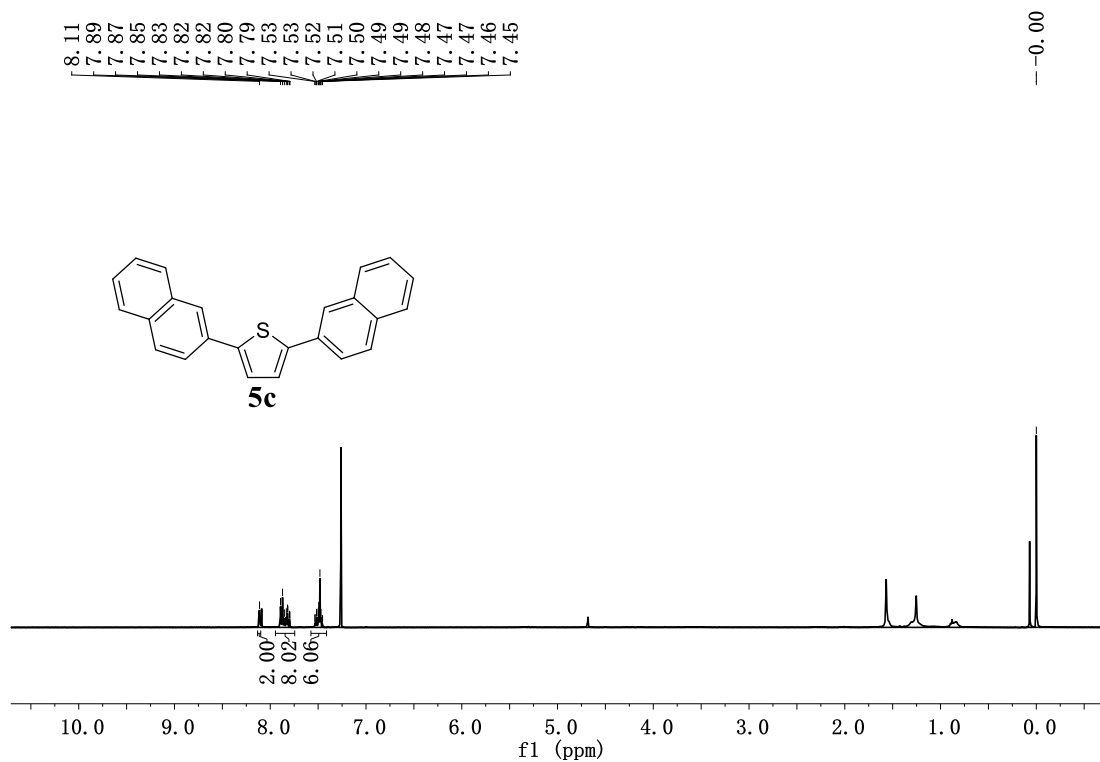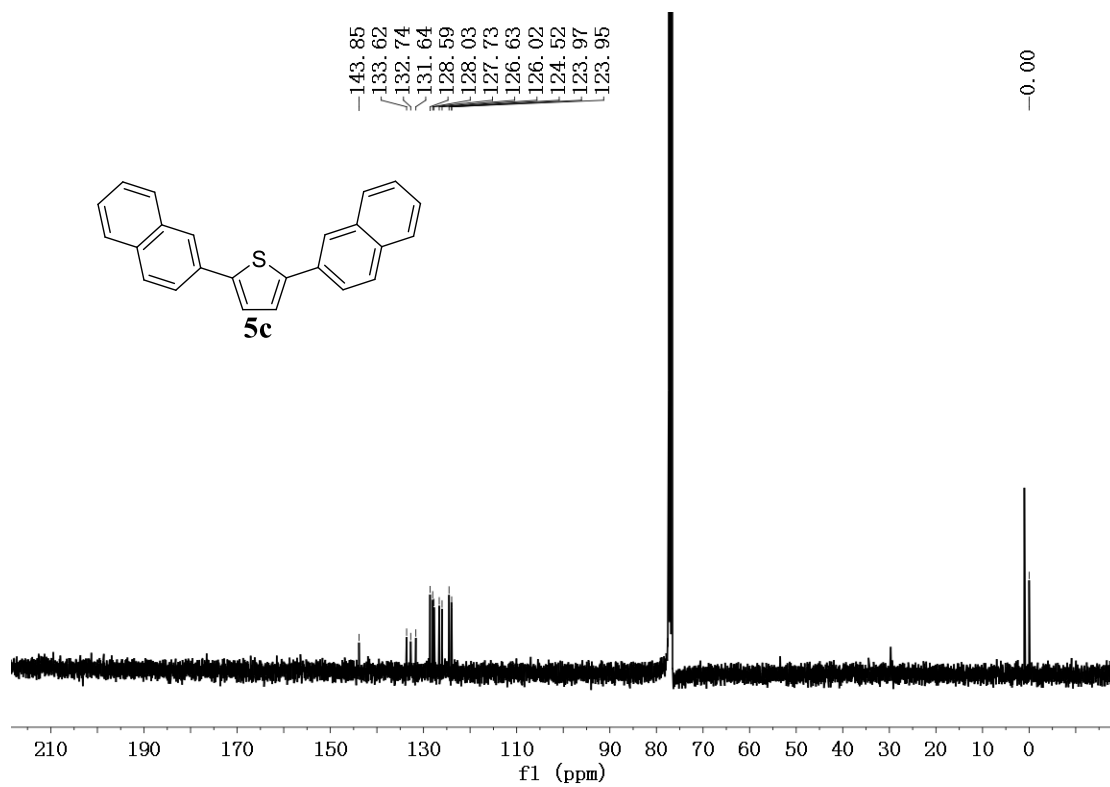

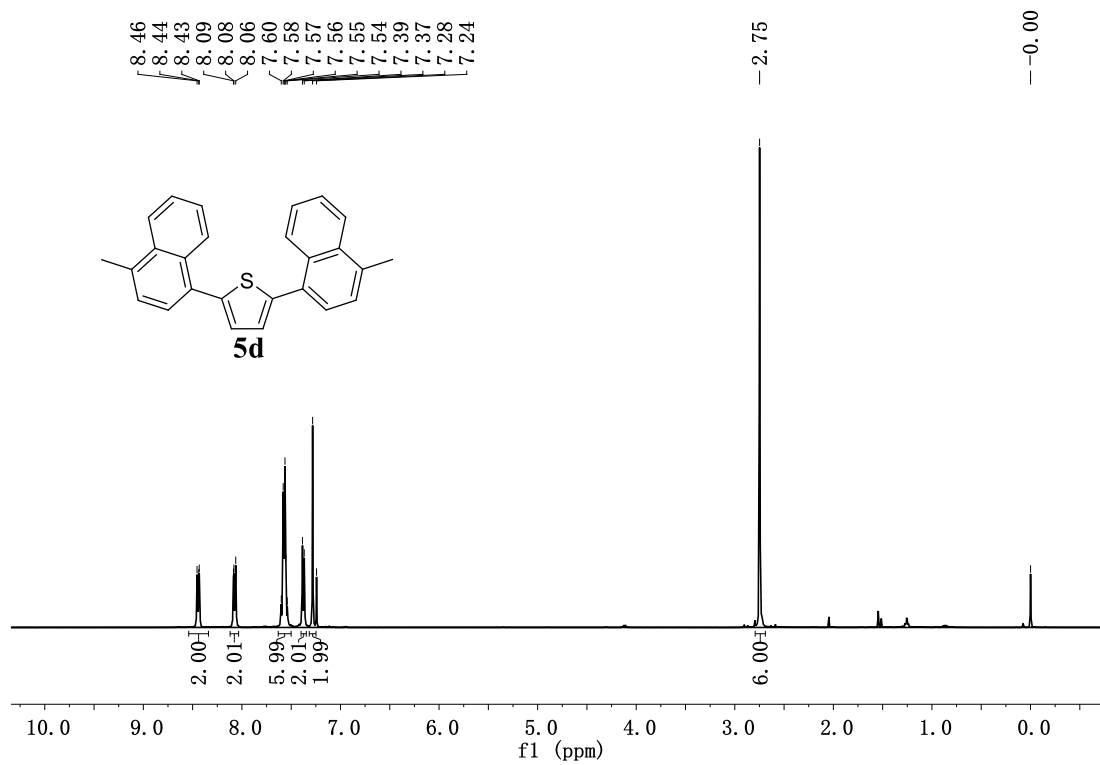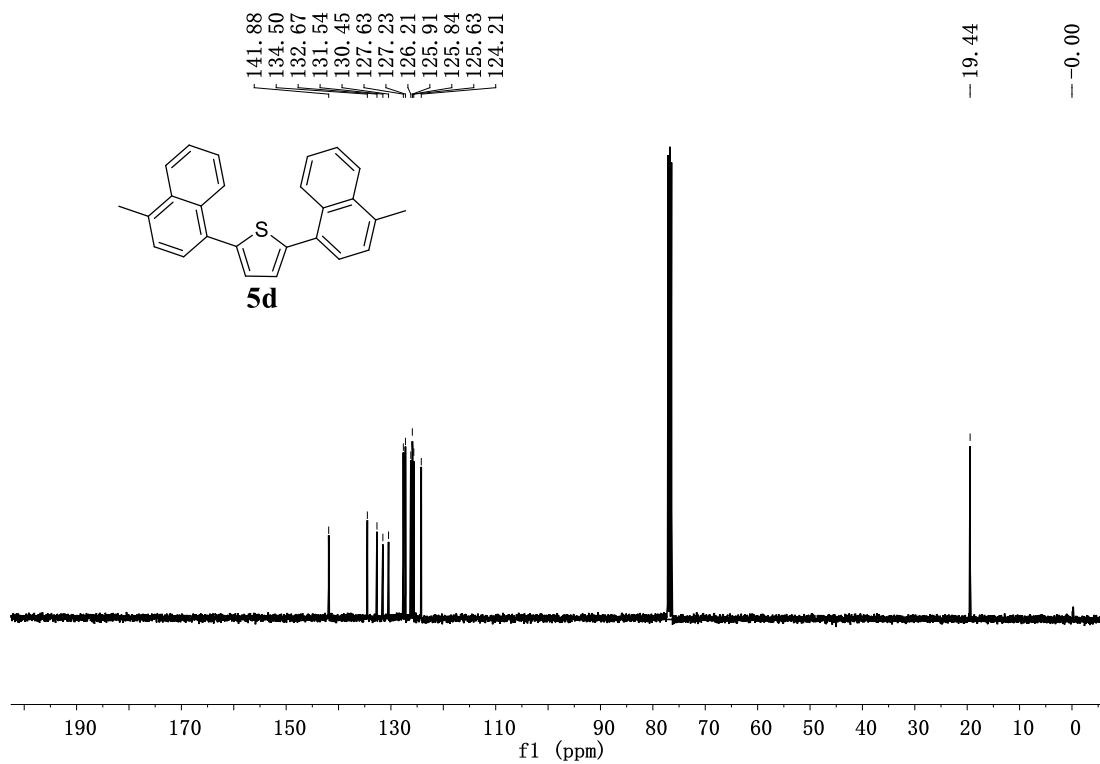

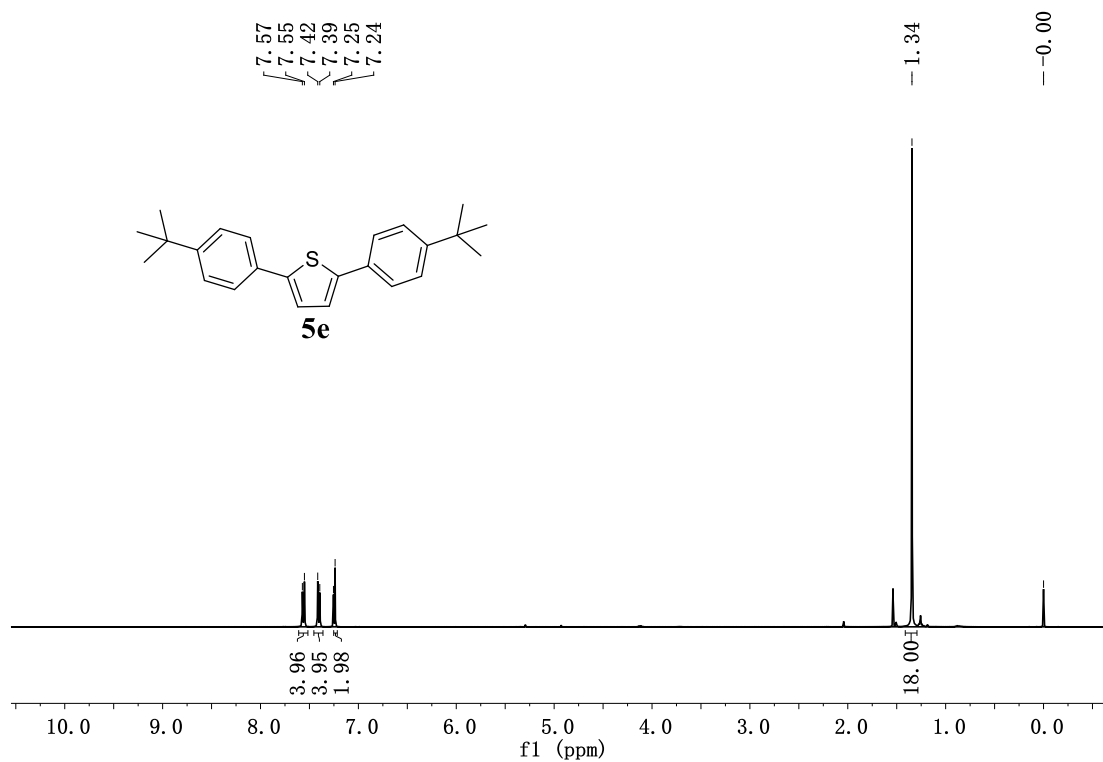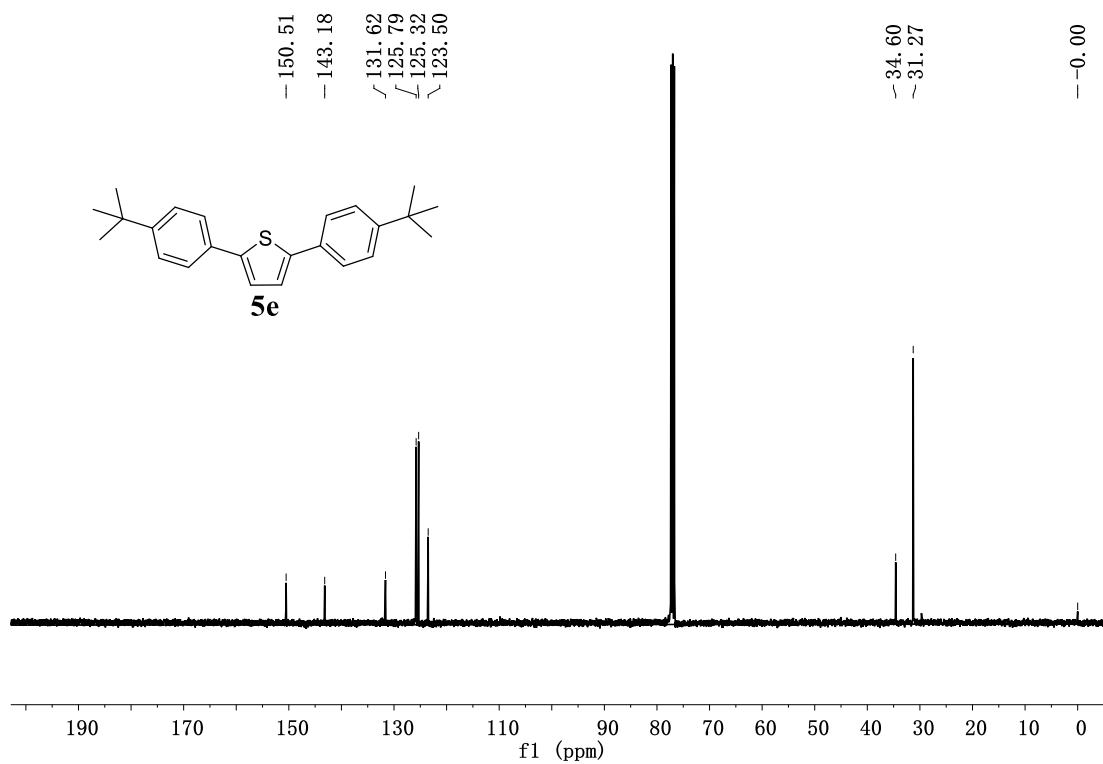

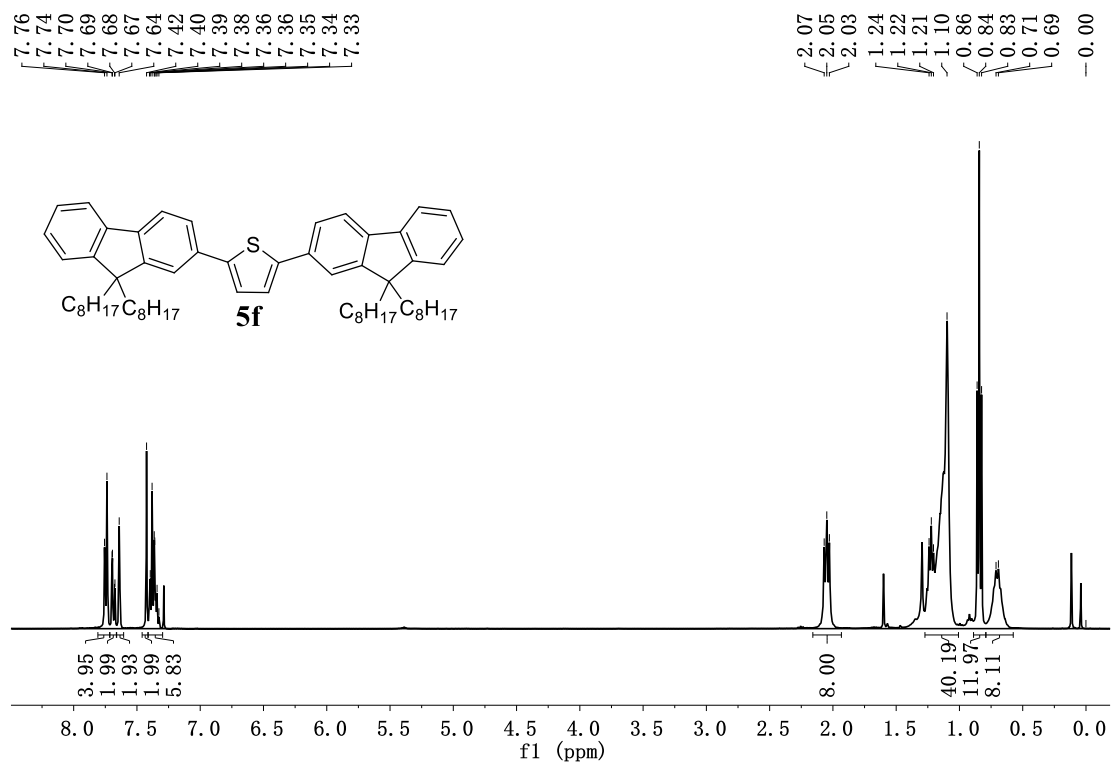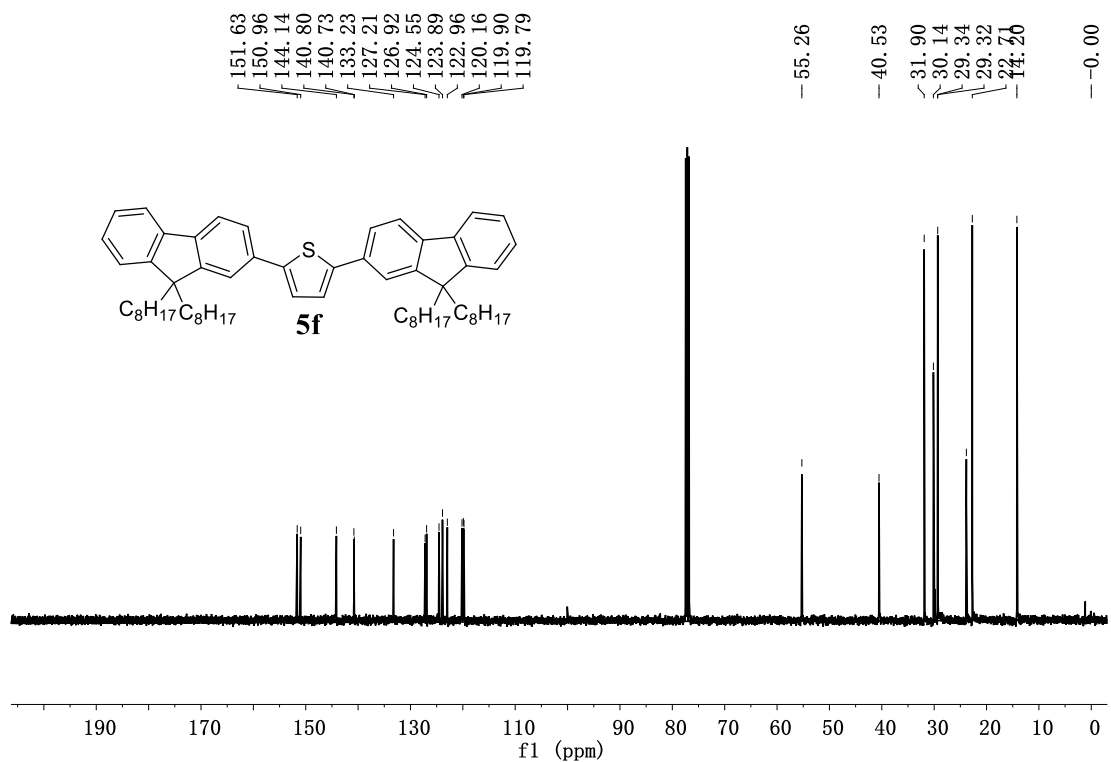

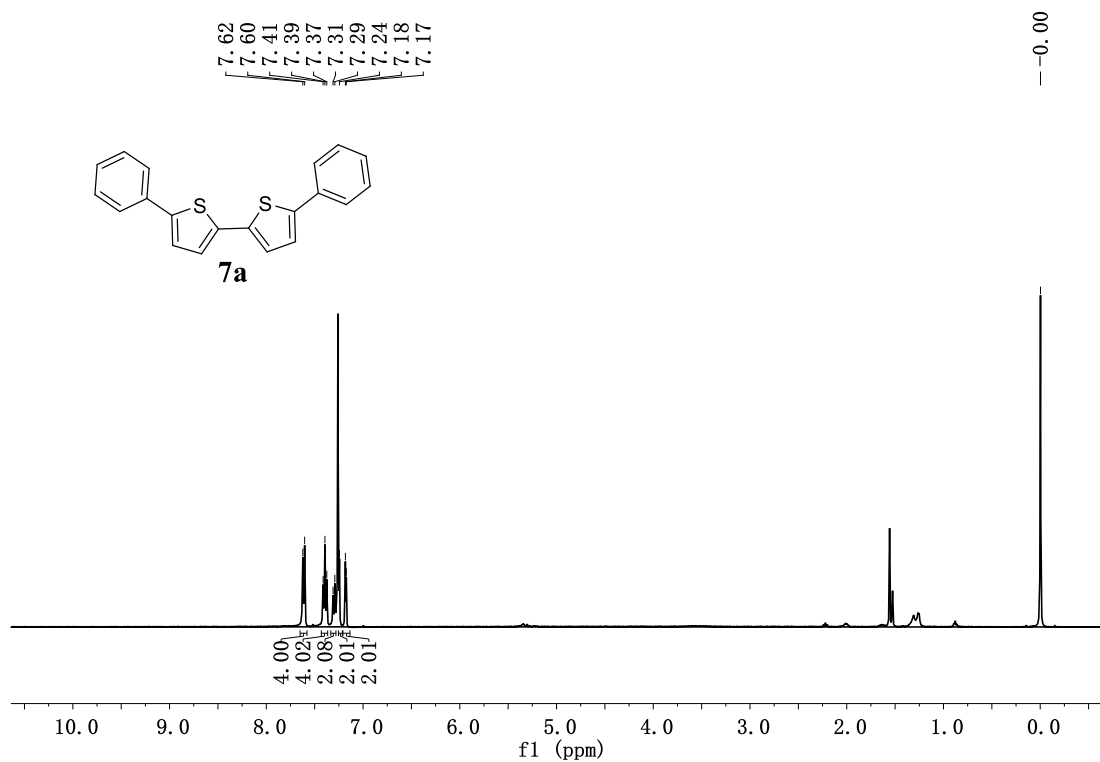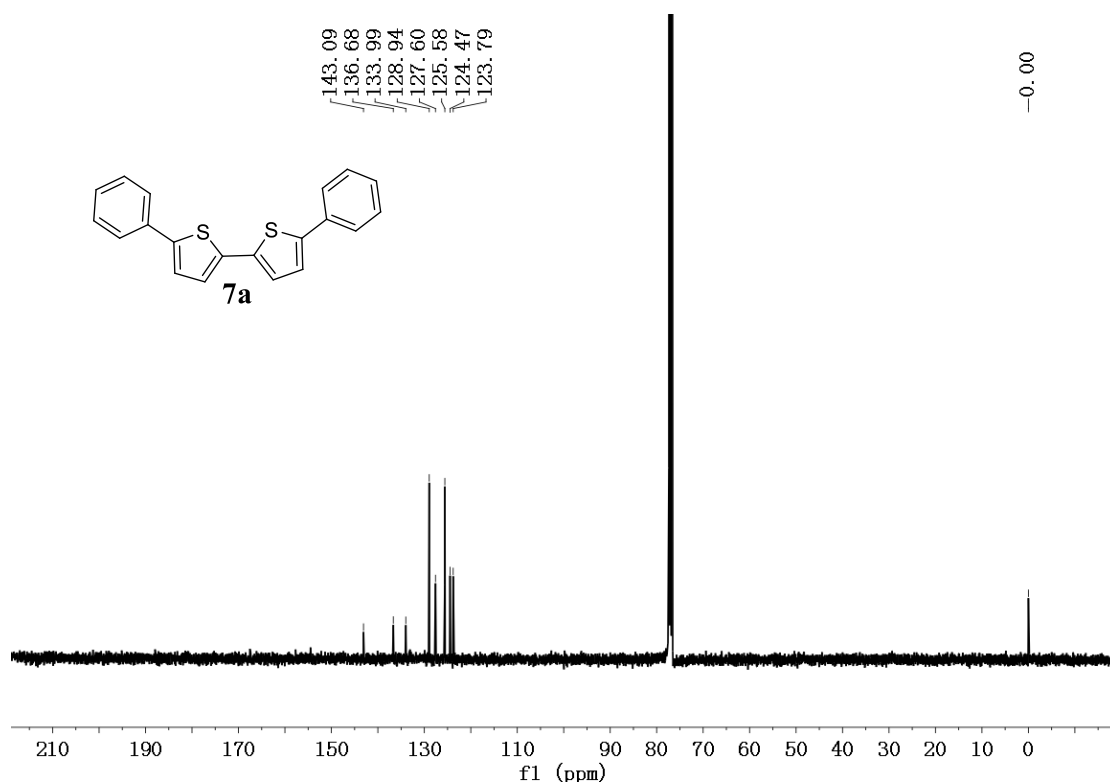

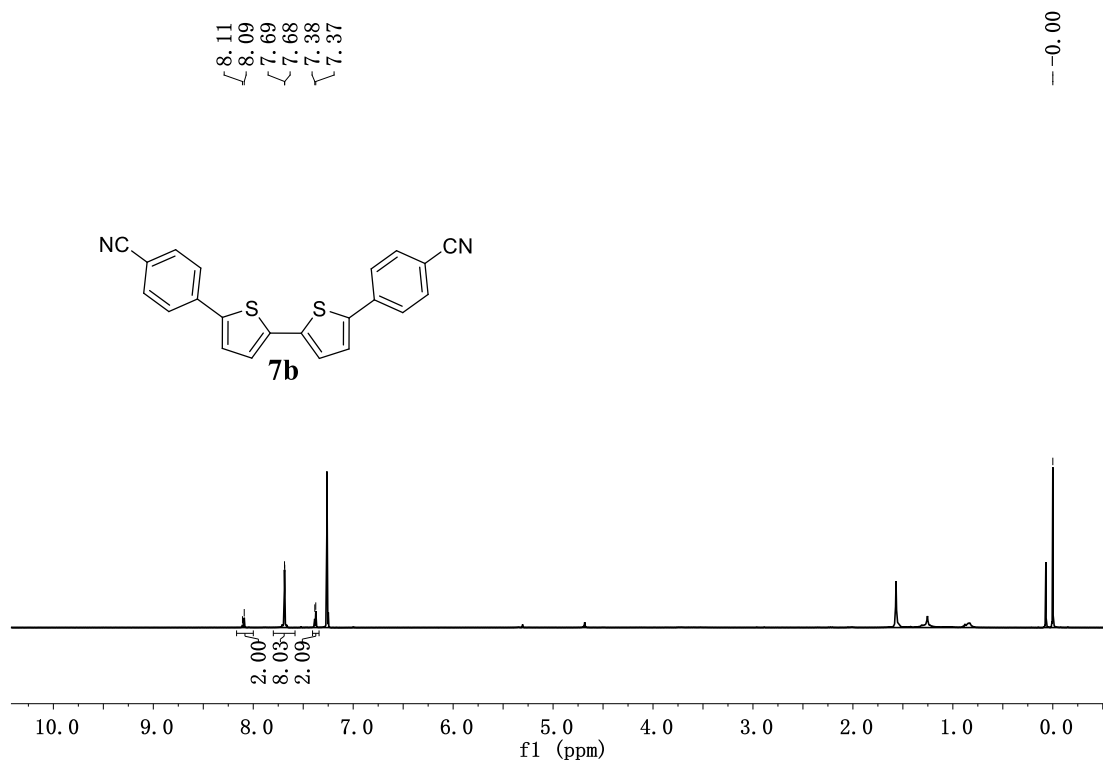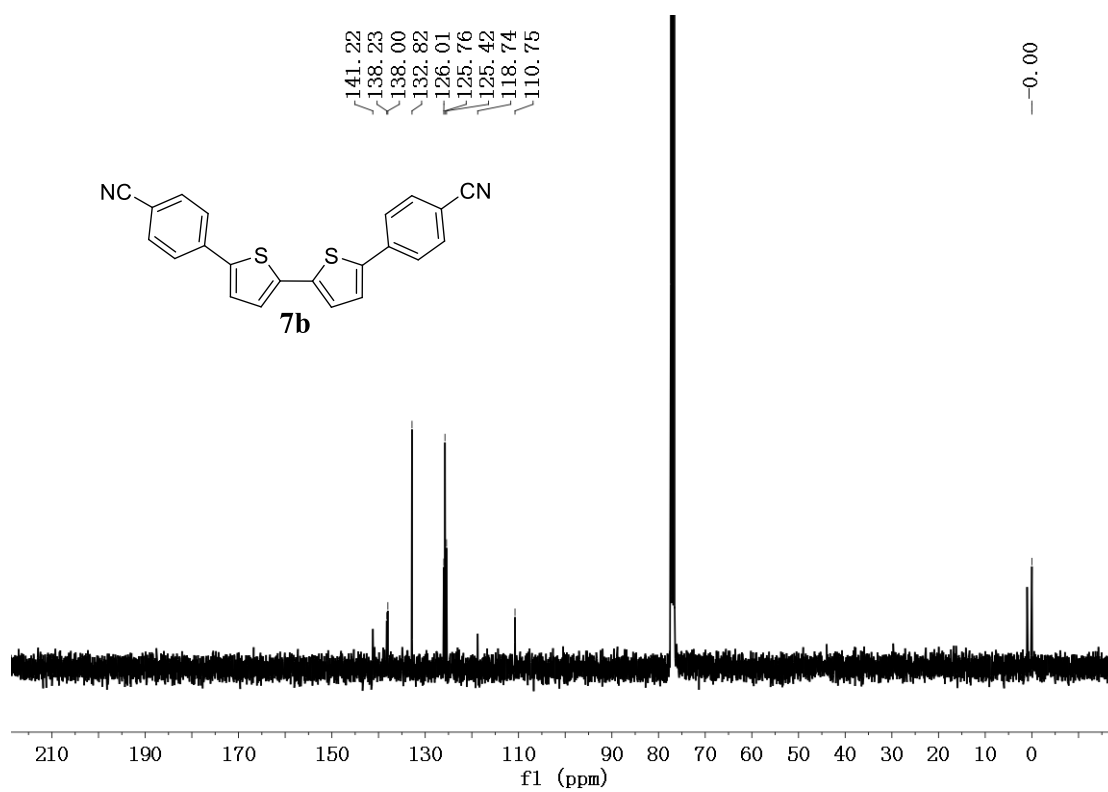

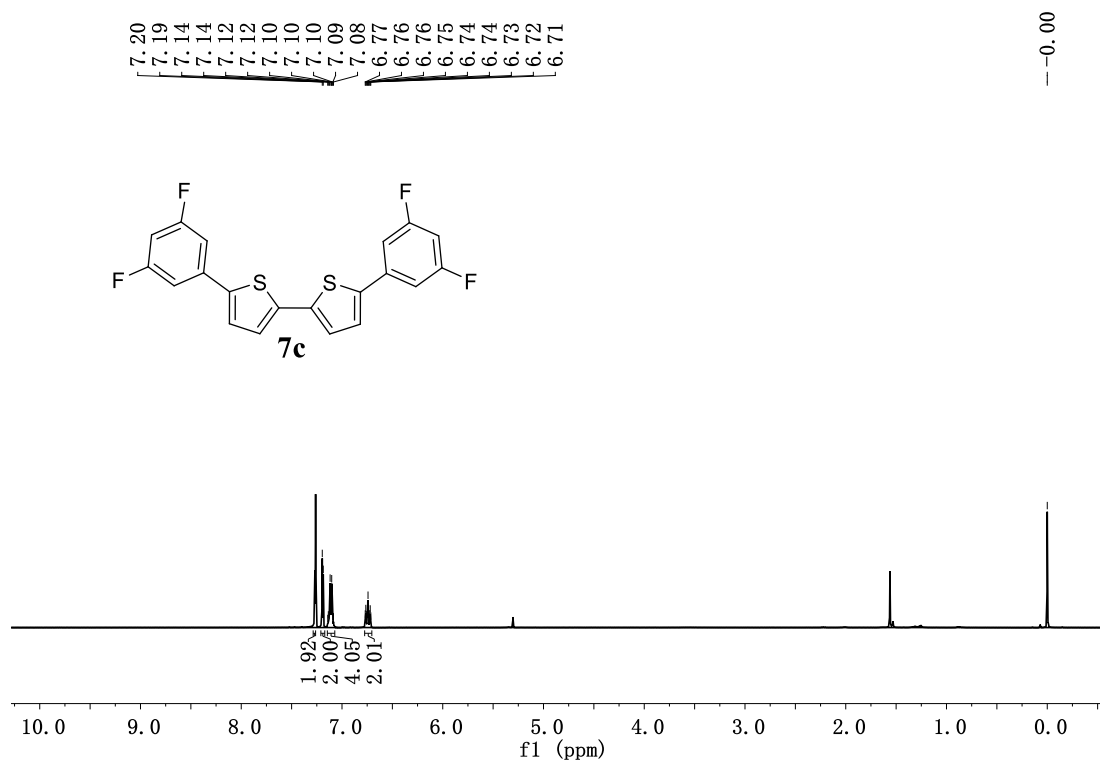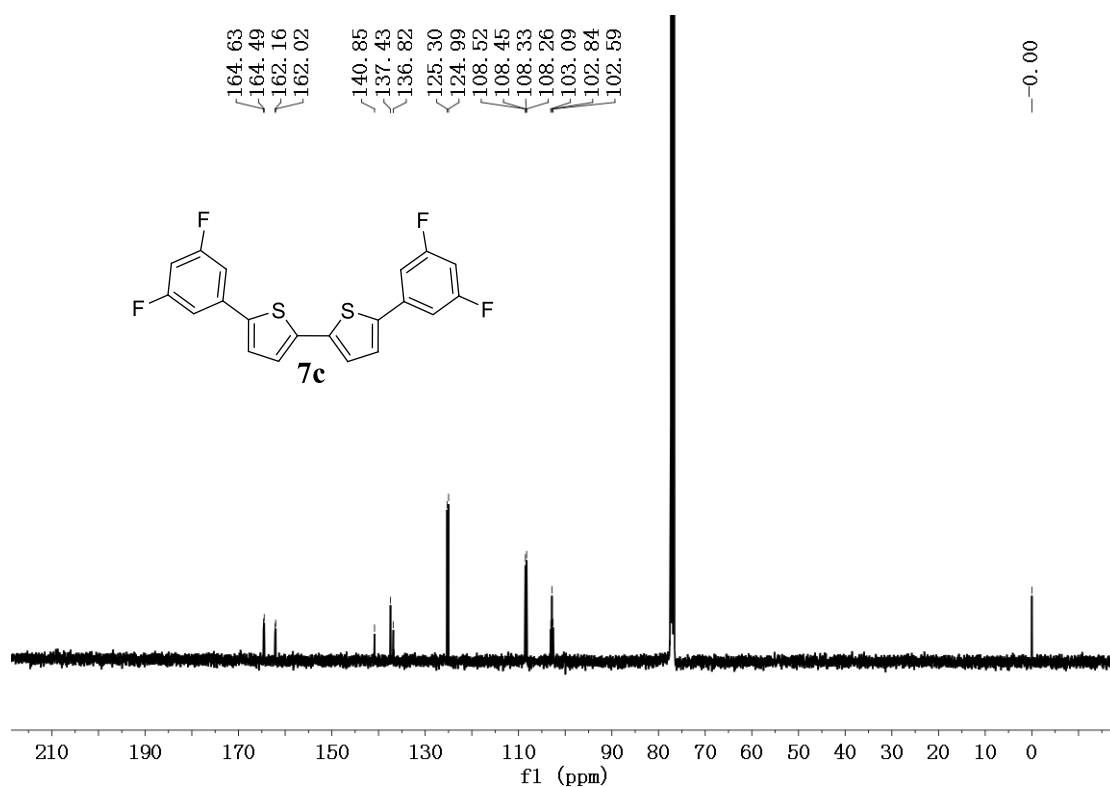

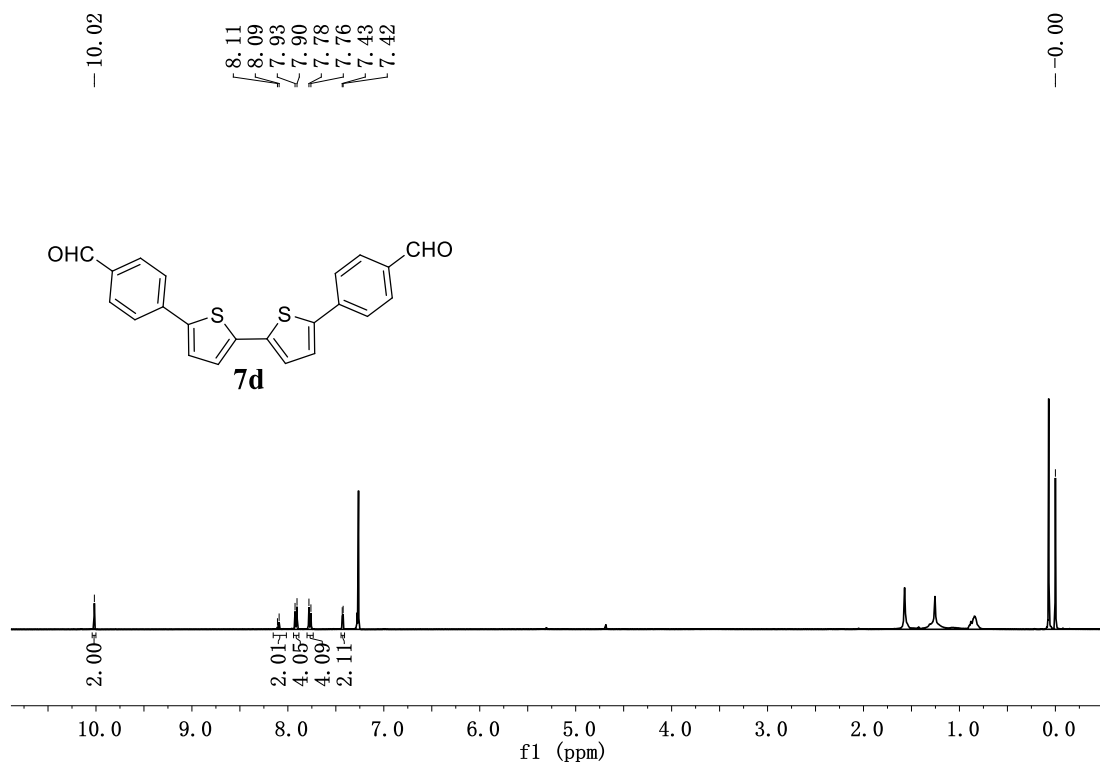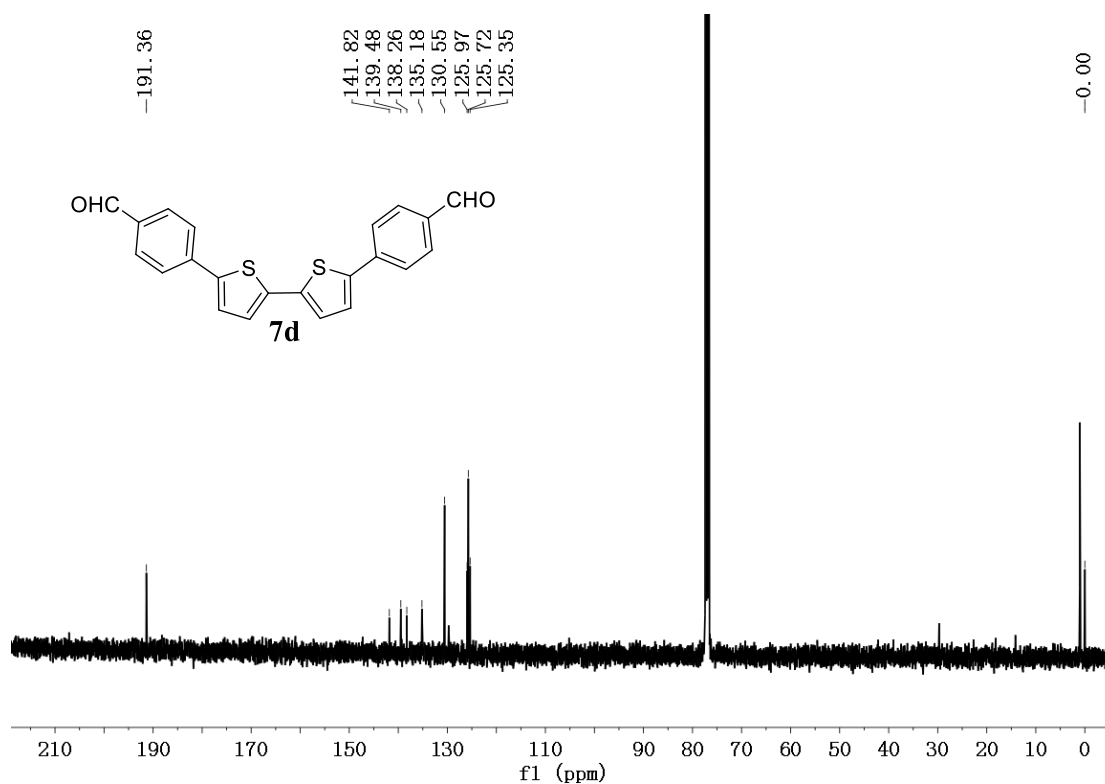





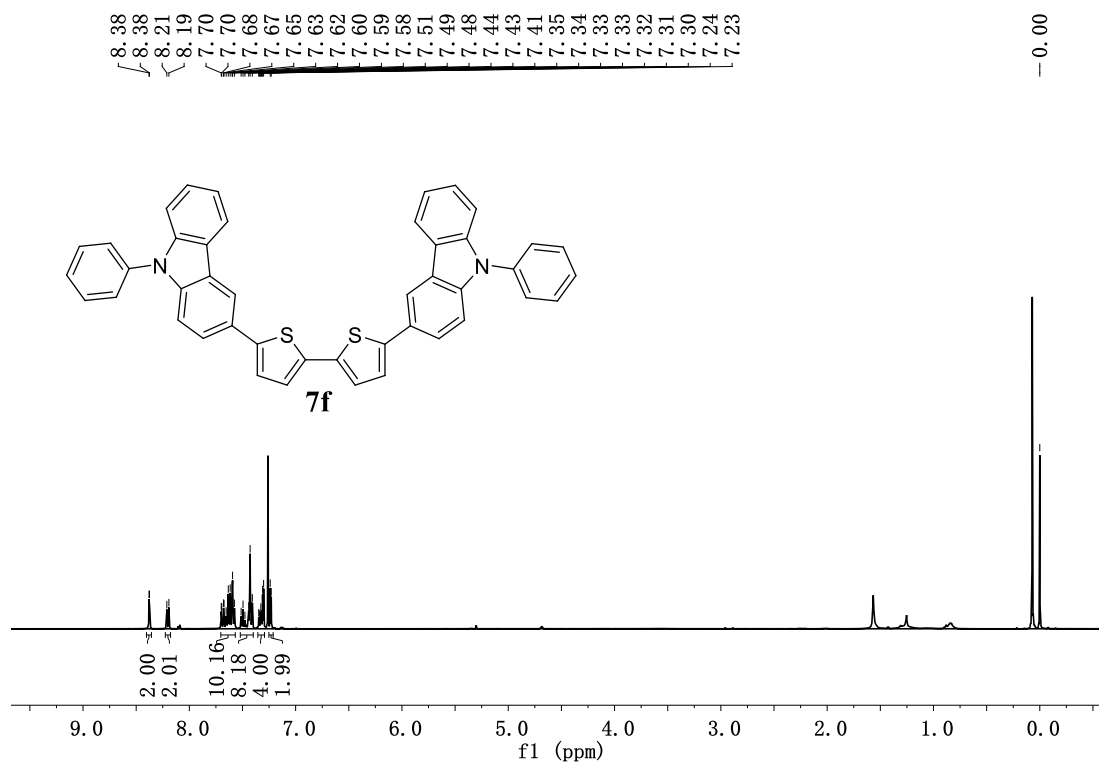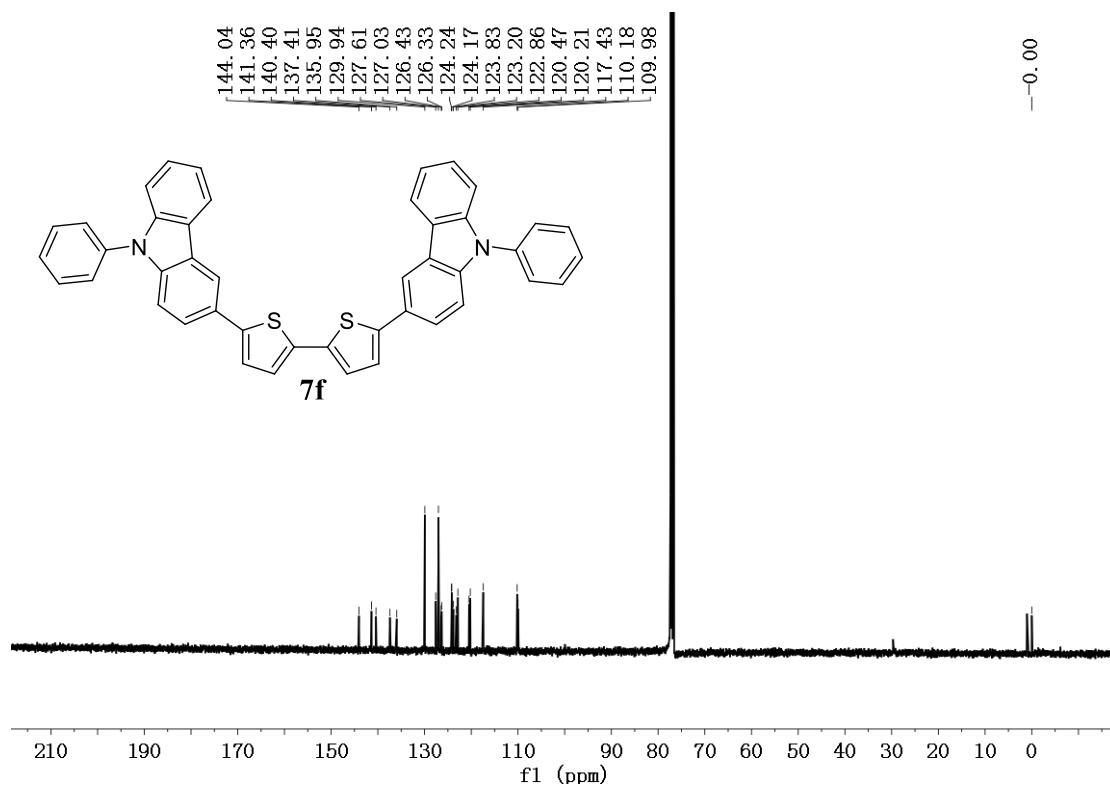

Supplement: c4qo00167b1.pdf [file c4qo00167b1.pdf]
